1                   **Exploring the metabolic landscape of pancreatic ductal**  
2                   **adenocarcinoma cells using genome-scale metabolic modeling**

3                   Mohammad Mazharul Islam<sup>1</sup>, Andrea Goertzen<sup>1</sup>, Pankaj K. Singh<sup>2,3</sup>, Rajib Saha<sup>1</sup>

4  
5  
6                   <sup>1</sup>Department of Chemical and Biomolecular Engineering, University of Nebraska-Lincoln,  
7                   Lincoln, NE 68588

8                   <sup>2</sup>Fred & Pamela Buffett Cancer Center, University of Nebraska Medical Center, Omaha, NE  
9                   68198

10                  <sup>3</sup>Eppley Institute for Research in Cancer and Allied Diseases, University of Nebraska Medical  
11                  Center, Omaha, NE 68198

12  
13  
14                  **Short title:** Modeling metabolic reprogramming in pancreatic ductal adenocarcinoma

15  
16                  \*Corresponding author:

17                  Rajib Saha

18                  Department of Chemical and Biomolecular Engineering

19                  University of Nebraska-Lincoln

20                  Lincoln, NE-68588, USA

21                  Email: [rsaha2@unl.edu](mailto:rsaha2@unl.edu)

22

23

## 24 **Abstract**

25 Pancreatic ductal adenocarcinoma (PDAC) is a major research focus due to its poor therapy  
26 response and dismal prognosis. PDAC cells adapt their metabolism efficiently to the  
27 environment to which they are exposed, often relying on diverse fuel sources depending on  
28 availability. Since traditional experimental techniques appear exhaustive in the search for a  
29 viable therapeutic strategy against PDAC, in this study, a highly curated and omics-informed  
30 genome-scale metabolic model of PDAC was reconstructed using patient-specific transcriptomic  
31 data. From the analysis of the model-predicted metabolic changes, several new metabolic  
32 functions were explored as potential therapeutic targets against PDAC in addition to the already  
33 known metabolic hallmarks of pancreatic cancer. Significant downregulation in the peroxisomal  
34 fatty acid beta oxidation pathway reactions, flux modulation in the carnitine shuttle system, and  
35 upregulation in the reactive oxygen species detoxification pathway reactions were observed.  
36 These unique metabolic traits of PDAC were then correlated with potential drug combinations  
37 that can be repurposed for targeting genes with poor prognosis in PDAC. Overall, these studies  
38 provide a better understanding of the metabolic vulnerabilities in PDAC and will lead to novel  
39 effective therapeutic strategies.

40

## 41 **Author summary**

42 Pancreatic ductal adenocarcinoma (PDAC) is the most common type of pancreatic cancer, with  
43 late diagnosis, early metastasis, insufficient therapy response, and very low survival rates. Due to  
44 these challenges associated with the diagnosis and treatment of PDAC, it has been a research  
45 area of interest. With the goal of understanding the metabolic reprogramming in proliferating  
46 PDAC cells, we reconstructed healthy and PDAC models by incorporating patient transcriptomic  
47 data into a genome-scale global human metabolic model. Comparing the metabolic flux space for  
48 the reactions in the two context-specific models, we identified significantly divergent pathways  
49 in PDAC. These results allowed us to further investigate growth-limiting genes in PDAC and  
50 identify potential drug combinations that can be repositioned for treatment of PDAC.

51

## 52 **Introduction**

53 Pancreatic ductal adenocarcinoma (PDAC), with poor prognosis, resistance to radio- and  
54 chemotherapy, and a five-year survival rate of only 8.2% is the most prevalent form of

55 pancreatic cancer and the third-leading cause of cancer-related morbidity in the USA[1]. Its poor  
56 prognosis can be attributed to its complicated and multifactorial nature, especially the lack of  
57 early diagnostic markers as well as its ability to quickly metastasize to surrounding organs[2-4].  
58 Additionally, high rates of glycolysis and lactate secretion are observed in PDAC cells, fulfilling  
59 the biosynthetic demands for rapid tumor growth[1]. The combined action of regulatory T cells  
60 (Treg), myeloid-derived suppressor cells (MDSCs), and macrophages blocks the CD8<sup>+</sup> T cell  
61 duties in tumor recognition and clearance and, ultimately, results in PDAC cells manifesting  
62 extensive immune suppression[2].

63  
64 PDAC microenvironment is greatly dominated by the presence of dense fibroblast stromal cells.  
65 In addition to creating an acidic extracellular environment, the dense stroma surrounding the  
66 tumor reduces oxygen diffusion into pancreas cells, resulting in hypoxia. In response to the  
67 reduced oxygen uptake, the tumor cells undergo metabolic reprogramming to favor Warburg  
68 effect metabolism<sup>12</sup>, which involves increased rates of glycolysis. Because cancer cells are  
69 characterized by unregulated growth, much of the cellular metabolism is hijacked to maximize  
70 the potential to generate biomass. Since PDAC cells are forced to live within a particularly  
71 severe microenvironment characterized by relative hypovascularity, hypoxia, and nutrient  
72 deprivation, these must possess biochemical flexibility in order to adapt to austere conditions.  
73 Rewired glucose, amino acid, and lipid metabolism and metabolic crosstalk within the tumor  
74 microenvironment contribute to unlimited pancreatic tumor progression. The metabolic  
75 alterations of pancreatic cancer are mediated by multiple factors. These cells survive and thrive  
76 mainly in three ways: (1) Reprogramming intracellular energy metabolism of nutrients, including  
77 glucose, amino acids, and lipids; (2) Improving nutrient acquisition by scavenging and recycling;  
78 (3) Conducting metabolic crosstalk with other components within the microenvironment[5]. In  
79 addition, the metabolic reprogramming involved in pancreatic cancer resistance is also closely  
80 related to chemotherapy, radiotherapy and immunotherapy, and results in a poor prognosis. Thus,  
81 investigations of metabolism not only benefit the understanding of carcinogenesis and cancer  
82 progression but also provide new insights for treatments against pancreatic cancer. A better  
83 understanding of the metabolic dependencies required by PDAC to survive and thrive within a  
84 harsh metabolic milieu could reveal specific metabolic vulnerabilities.

85 Systemic chemotherapy is presently the most frequently adopted treatment strategy for PDAC.  
86 However, chemotherapy treatments often show limited success due to intrinsic and acquired  
87 chemoresistance[6, 7]. While many previous studies have predicted potential biomarkers for  
88 therapeutic purposes, including the *ribonucleotide reductase catalytic subunits M1/2 (RRM1/2)*,  
89 an enzyme catalyzing the reduction of ribonucleotides, or the *human equilibrative nucleoside*  
90 *transporter 1 (hENT1)*, a transmembrane protein, the treatment with drugs (i.e., gemcitabine and  
91 other combinatorial drugs) often failed [8-12]. The hypoxic microenvironment is also resistive to  
92 radiation dosage, reducing the efficacy of radiotherapy. In addition, the overexpression of key  
93 regulators of the DNA damage response (e.g., *RAD51* in PDAC) has been reported to contribute  
94 to the accelerated repair of DNA damage [128, 129]. Several genes have been reported to be  
95 frequently mutated in PDAC (i.e., *KRAS*, *CDKN2A*, *TP53*, and *SMAD4*)[13, 14] and, therefore,  
96 received increased attention as potential drug targets [15-19]. However, successful therapeutic  
97 strategies are yet to be developed [20-22]. The downstream events of metabolic reprogramming  
98 are considered as prominent hallmarks of PDAC[23]. Therefore, tackling this aggressive cancer  
99 through establishing a clear understanding of its metabolism has been a critical challenge to the  
100 scientific and medical communities. Since the underlying mechanism of these drug-resistive  
101 metabolic traits are only poorly understood, it warrants the use of novel computational  
102 techniques to understand the metabolic landscape of tumor progression and further compliment  
103 the going experimental efforts.

104 The increase in knowledge of macromolecular structures, availability of numerous biochemical  
105 database resources, advances in high-throughput genome sequencing, and increase in  
106 computational efficiency have accelerated the use of *in silico* methods for metabolic model  
107 development and analysis, biomarkers/therapeutic target discovery, and drug development[24-  
108 29]. These models provide a systems-level approach to studying the metabolism of tumor cells  
109 based on conservation of mass under pseudo-steady state condition. Since genome-scale  
110 metabolic models are capable of efficient mapping of the genotype to the phenotype [30-35],  
111 integrating multi-level omics data with these models enhances their predictive power and allows  
112 for a systems-level study of the metabolic reprogramming happening in living organisms under  
113 various genetic and environmental perturbations or diseases. Applications of the genome-scale  
114 metabolic modeling to cancer includes network comparison between healthy and cancerous cells,

115 gene essentiality and robustness studies, integrative analysis of omics data, and identifying  
116 reporter pathways and reporter metabolites [36-40]. For example, Turanli *et. al* used metabolic  
117 modeling to pinpoint drugs that could effectively hinder growth of prostate cancer[37]. Similarly,  
118 Katzir, *et. al* mapped the reactions and pathways in breast cancer cells using a human metabolic  
119 model and various "omics" datasets[41]. Pancreatic cell and pancreatic cancer metabolism have  
120 been modeled before as a part of reconstructing draft models of several human cell types aimed  
121 at identification of anticancer drug through personalized genome-scale metabolic models [28,  
122 42]. Although a pan-cancer analysis of the metabolic reconstructions of ~4000 tumors were  
123 attempted recently [43], the models generated were tasked with only finding the origin of the  
124 cancer-specific genes and reactions, and were not essentially curated and refined to achieve a  
125 high level of predictability. Kinetic modeling of the pancreatic tumor proliferation was also  
126 attempted, by modeling the glycolysis, glutaminolysis, tricarboxylic acid cycle, and the pentose  
127 phosphate pathway to find enzyme knockout or metabolic inhibitions suppressing the tumor  
128 growth [44]. While these studies have advanced our understanding of the metabolic landscape of  
129 pancreatic ductal adenocarcinoma or cancer in general, there is still necessity of a highly curated  
130 and predictive genome-scale metabolic model in order to have a system-level understanding of  
131 the metabolic changes.

132  
133 To understand the PDAC-associated metabolic reprogramming that involves changes in the  
134 metabolic reaction fluxes and metabolite levels, genome-scale metabolic reconstructions of the  
135 healthy human pancreas and the PDAC cells encompassing the genes, metabolites, and reactions,  
136 were developed. This reconstruction process utilized patient transcriptomic dataset from the  
137 Cancer Genome Atlas (<https://www.cancer.gov/tcga>). The models were used to elucidate the  
138 altered metabolism of PDAC cells compared to the healthy pancreas. A concise schematic of the  
139 workflow in this study is presented in Figure 1. Upon incorporation of the transcriptomic data,  
140 the shifts in reaction flux spaces were observed across the metabolic network, notably in  
141 glycolysis, pentose phosphate pathway, TCA cycle, fatty acid biosynthesis, Arachidonic acid  
142 metabolism, carnitine metabolism, cholesterol biosynthesis, and ROS detoxification metabolism.  
143 Many of the observed metabolic shifts are in accordance with previously identified cancer  
144 hallmarks in omics-based studies. In addition, unique metabolic behavior was observed in  
145 mitochondrial and peroxisomal fatty acid beta oxidation, various parts of lipid biosynthesis and

146 degradation, and ROS detoxification, which are discussed as potential for prognostic biomarkers.  
147 Significant downregulation in the peroxisomal fatty acid beta oxidation pathway reactions was  
148 observed in this study, which explains the shifts in cellular energy production and storage  
149 preference during pancreatic tumor proliferation. Furthermore, flux modulation in the carnitine  
150 shuttle system and the upregulation in the reactive oxygen species detoxification pathway  
151 reactions that was observed in this study indicate the unique strategies the PDAC cells adopt for  
152 survival. Potential drug repositioning and synergistic interaction between existing drugs that  
153 repressed the differentially expressed genes with poor prognosis in PDAC were identified. These  
154 findings manifest the predictive capabilities of genome-scale metabolic models at the reactome-  
155 level and can potentially direct new therapeutic approaches.  
156

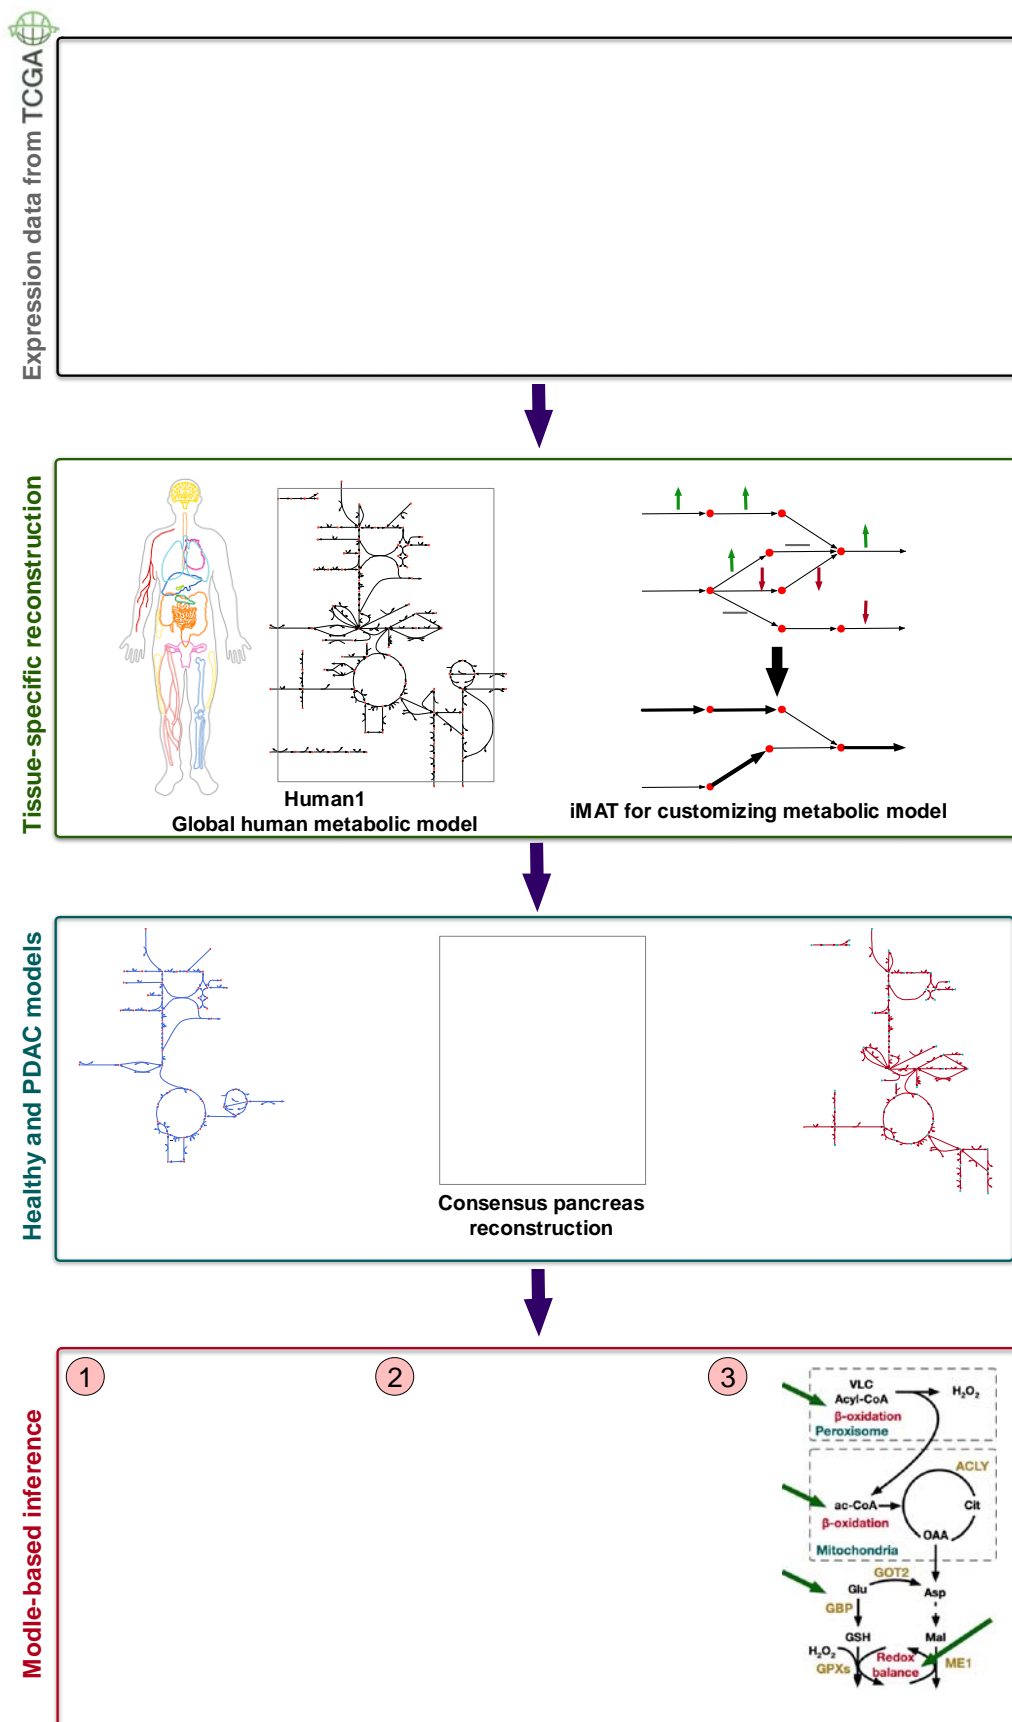

158 **Figure 1:** Schematic of the workflow for generating healthy pancreas and PDAC model and  
159 elucidating the metabolic divergence in PDAC.

160

## 161 **Results and Discussion**

### 162 **Tissue-specific consensus pancreas metabolic reconstruction using transcriptomics data**

163 A metabolic model describes reaction stoichiometry and directionality, gene-protein-reaction  
164 associations (GPRs), organelle-specific reaction localization, transporter/exchange reaction  
165 information, transcriptional/translational regulation, and biomass composition[45]. By defining  
166 the metabolic space, genome-scale metabolic models can assess allowable cellular phenotypes  
167 and explore the metabolic potential and restrictions under specific disease conditions[46]. The  
168 latest global human metabolic reconstruction, Human1[47], is an extensively curated, genome-  
169 scale model of human metabolism. It unified two previous and parallel model reconstruction  
170 lineages by the Systems Biology community, namely the Recon[48-50] and the Human  
171 Metabolic Reaction (HMR)[51, 52] series using an open-source version-controlled repository. In  
172 addition to curating the aggregated reconstruction, Human1 addressed issue with duplication,  
173 reaction reversibility, mass and energy conservation, imbalance, and constructed a new generic  
174 human biomass reaction based on various tissue and cell composition data sources. This  
175 standardized model allowed us to conveniently integrate omics data to develop a pancreas-  
176 specific metabolic reconstruction.

177

178 The transcriptomic data used to customize the global human model to a pancreatic reconstruction  
179 was obtained from the Cancer Genome Atlas (TCGA) database (<https://www.cancer.gov/tcga>).  
180 The Cancer Genome Atlas contains genomic, epigenomic, transcriptomic, and proteomic data on  
181 33 cancer types in human, and is publicly available for the scientific research community. To  
182 obtain a representative set of transcriptomic data on both healthy and cancerous pancreas cells,  
183 18 samples from the TCGA-PAAD project that contained quantified RNASeq transcriptomic  
184 data, were used. These samples contained Fragments Per Kilobase of transcript per Million  
185 mapped reads (FPKM) data of individuals from different ethnic backgrounds, ages, and sexes.  
186 Since the dataset accounted for a numerical expression value of every single of the 60483 genes  
187 across all the samples without any unique genes in the samples, the dataset was filtered for genes  
188 with no read count across samples. After that, 50392 genes remained, out of which 3628



189 metabolic genes overlapped with the genes in the Human1 metabolic reconstruction[47].  
190 Differential gene expression analysis of the metabolic genes within the transcriptomic dataset  
191 from TCGA revealed 102 significantly differentially expressed genes, among which 53 showed  
192 significant upregulation and 49 showed repression in PDAC cells compare to healthy pancreatic  
193 cells (see details in Methods). Genes involved in glycolysis/gluconeogenesis, fatty acid and  
194 cholesterol biosynthesis, tRNA synthesis, Arachidonic acid metabolism, protein kinases,  
195 glutathione metabolism, RNA polymerase, DNA repair, mitochondrial beta oxidation, cytosolic  
196 carnitine metabolism, leukotriene and linoleate metabolism, and estrogen metabolism were  
197 consistently upregulated in all PDAC samples. On the other hand, genes related acylglyceride  
198 metabolism, peroxisomal beta oxidation, mitochondrial and peroxisomal carnitine metabolism,  
199 several peroxidases, chondroitin, keratan, and heparan sulfate biosynthesis, glycerolipid  
200 metabolism, and different types of vitamin metabolism, including vitamins B12, D, and E,  
201 showed significant downregulation in PDAC. The complete results of differential gene  
202 expression analysis are presented in Supplementary information 1.

203  
204 The preliminary pancreas metabolic reconstruction was obtained using the FPKM values for the  
205 3628 metabolic genes in the TCGA dataset by iMAT[53] (details in the Methods section). It  
206 contained 3,628 genes, catalyzing 7,076 reactions, involving 4,415 metabolites located in 8  
207 intracellular compartments (Cytosol, Mitochondria, Inner mitochondria, Golgi apparatus,  
208 Lysosome, Nucleus, Peroxisome, and Endoplasmic reticulum). The reactions are distributed  
209 across 133 different pathways, the largest of which include transport reactions, exchange/demand  
210 reactions, fatty acid oxidation, and peptide metabolism. Flux Variability Analysis[54] found that  
211 the 1444 reactions across 54 pathways could occur an unreasonably high rate not supported by  
212 thermodynamics, which are named unbounded reactions. The pathways contributing the largest  
213 number of unbounded reactions were transport, fatty acid oxidation, nucleotide metabolism, and  
214 drug metabolism. After the model had been refined by rectifying reaction imbalances and  
215 identifying and fixing infeasible cycles using Optfill[55] (see a complete list in Supplementary  
216 information 2), a thermodynamically feasible intermediate metabolic reconstruction of the  
217 pancreas encompassing all the reactions in both healthy and cancerous pancreas cells was  
218 obtained. This reconstruction was used as a baseline for generating the healthy and cancerous  
219 genome-scale pancreas metabolic model.

220

## 221 **Metabolic models of PDAC and healthy pancreas cell**

222 The healthy pancreas and PDAC models were reconstructed from the consensus metabolic  
223 reconstruction of the pancreas. The Integrative Metabolic Analysis tool (iMAT)[53] was used to  
224 customize the model according to the gene expression values and corresponding ranking of the  
225 reactions (see methods section for details) in both healthy and PDAC cells. The healthy cell  
226 model contains 3,628 genes, catalyzing 6,384 reactions, across 129 pathways, involving 4,703  
227 metabolites, while the PDAC cell model contains 3,628 genes, catalyzing 5,872 reactions, across  
228 127 pathways, involving 4,381 metabolites. In both models, the pathways involving the largest  
229 number of internal reactions include fatty acid oxidation, cholesterol formation, peptide  
230 metabolism, and transport reactions. Supplementary information 3 and 4 contain the genome-  
231 scale metabolic model of the healthy and cancerous pancreas cells in Systems Biology markup  
232 Language level 3 version 1, respectively.

233

234 Figure 2 shows further details of the two models. While there are 5180 reactions overlap between  
235 the healthy and PDAC models, they have 1204 and 692 unique metabolic reactions, respectively  
236 (see Figure 2A and 2B). The unique reactions are distributed across divergent pathways in these  
237 two models (Figure 2C). The PDAC model distinctly shows better completeness of the Acyl-  
238 CoA hydrolysis, leukotriene metabolism, and starch and sucrose metabolism. On the other hand,  
239 many pathways have a more complete presence in the healthy cell model, including amino acid  
240 metabolism, structural carbohydrates (heparan and keratan sulfate) degradation, glycan  
241 metabolism, bile acid synthesis, and TCA cycle. While the more complete Acyl-CoA hydrolysis  
242 and sugar metabolism have been known to be associated with cancer cells, particularly  
243 interesting are the more complete leukotriene metabolism and lack of structural carbohydrate  
244 degradation pathways in the PDAC cell. It has been reported that the leukotrienes derived from  
245 membrane phospholipids play an important role in carcinogenesis [56, 57]. Furthermore,  
246 glycosaminoglycans (e.g., keratan sulfate, heparan sulfate, chondroitin sulfate) degradation in  
247 lysosomes are part of the normal homeostasis of glycoproteins. These molecules must be  
248 completely degraded to avoid undigested fragments building up and causing a variety of  
249 lysosomal storage diseases [58]. Lack of these degradation pathways in the PDAC indicate an

250 increased accumulation of glycosaminoglycans in the tumor cell, which have previously been  
 251 associated with cancer metastasis [59, 60].  
 252

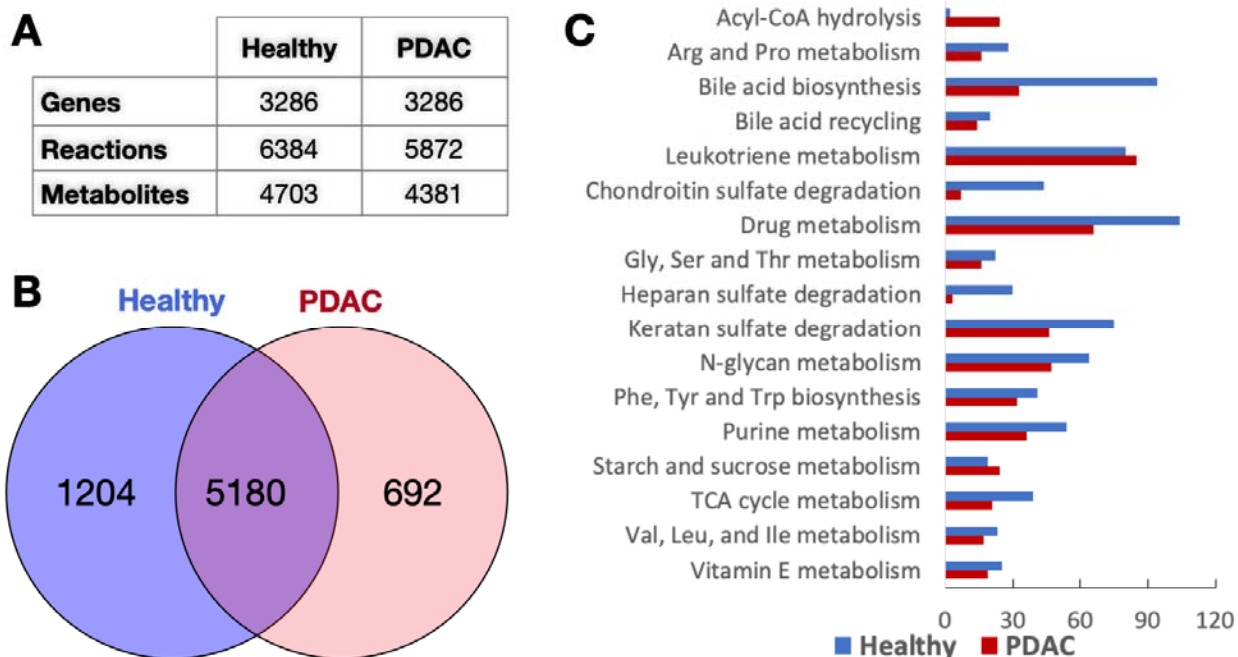

253  
 254 **Figure 2:** Model statistics for the healthy pancreas and the PDAC models. A) Numbers of  
 255 Genes, Reactions, and Metabolites, B) overlap and uniqueness of metabolic reactions (Blue:  
 256 Healthy, Red: PDAC), and C) Most divergent pathways between the two models.

257  
 258 **Unique metabolic traits in PDAC**

259 The mathematically feasible flux ranges of the reactions in the healthy and PDAC models were  
 260 assessed (see details in Methods sections) to explore the distinct shifts in PDAC cell metabolism.  
 261 In Figure 3, the pathways with the biggest fraction of reaction fluxes significantly upregulated  
 262 and downregulated are shown (a more detailed version is presented in Supplementary  
 263 Information 5). While the observed metabolic shifts agree with the differential gene expression  
 264 results discussed above, they also reveal some unique metabolic traits in PDAC. The model  
 265 simulation results capture the most well-known metabolic hallmarks of pancreatic ductal  
 266 adenocarcinoma. For example, the expansion of the flux space of the reactions in glycolytic  
 267 pathways, bile acid biosynthesis, nucleotide metabolism, pentose phosphate pathway, and

268 arachidonic acid metabolism is consistent with many studies[19, 23, 56] on pancreatic cancer in  
269 recent years.

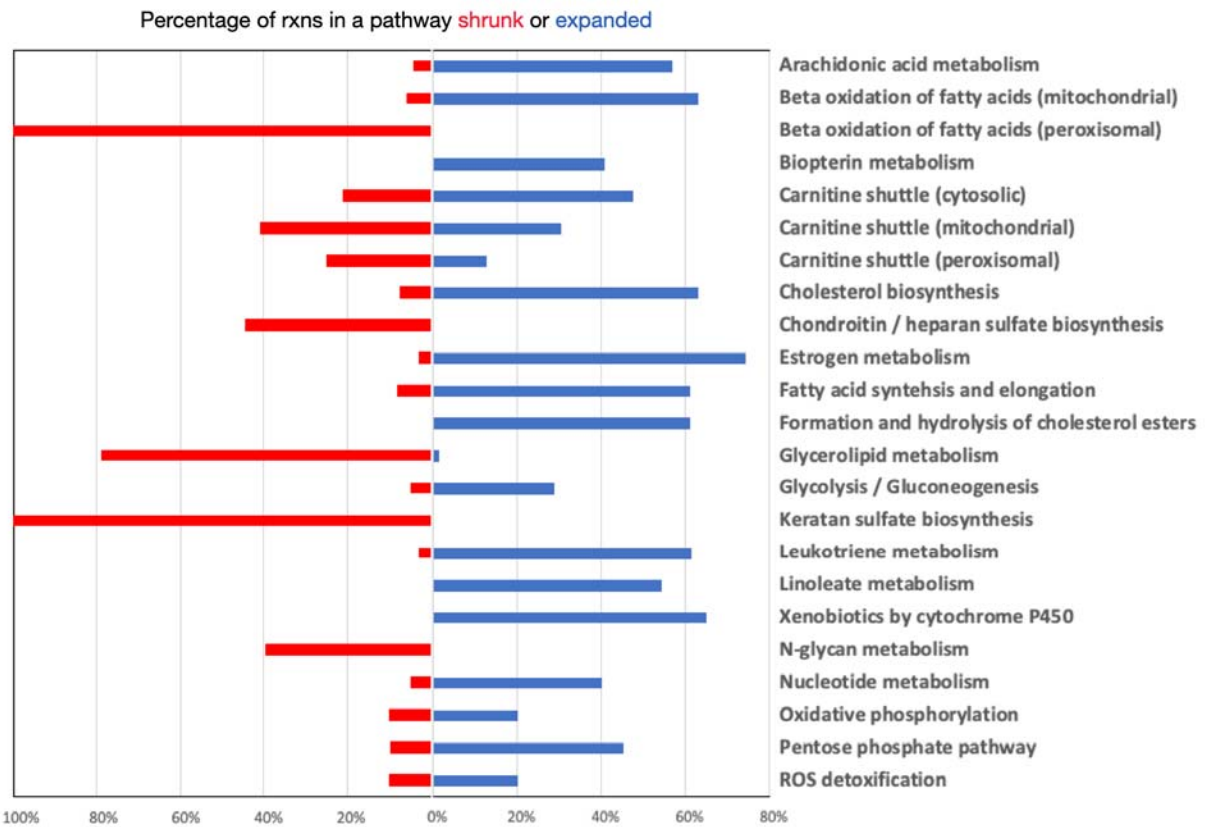

270  
271 **Figure 3:** Significantly upregulated and downregulated pathways in PDAC cell metabolism. The  
272 bars (red: downregulated, blue: upregulated) represent the percentage of the total number of  
273 reactions in the respective pathway that changed their flux ranges.

274  
275 These major metabolic reprogramming in pancreatic ductal adenocarcinoma arises from the  
276 well-known Warburg effect[61] due to constitutive activation of KRAS oncogene [62, 63].  
277 KRAS activation in PDAC cells upregulates the uptake of glucose and enhance the glycolytic  
278 flux, including the production of lactate through lactate dehydrogenase (which demonstrates  
279 expanded flux ranges in PDAC) and channels carbon flux into the hexosamine biosynthetic  
280 pathway and pentose phosphate pathway. Both primary and metastatic PDAC tumors  
281 demonstrate increased glycolytic gene expression [64]. Notably, upregulation of pentose  
282 phosphate pathway and the downstream nucleotide biosynthesis pathway has been implicated in  
283 PDAC progression and therapy resistance [65-71]. Increased bile acid secretion has previously  
284 been identified in PDAC patients, which is indicative of tumor expansion into the bile duct[72]

285 and may result in bile acid reflux into the pancreatic duct and acinar cells, from which PDAC is  
286 derived[73]. *NR1D1*, one of the two differentially expressed regulator genes, positively regulates  
287 bile acid synthesis[74], indicating a possible link between overexpression of that gene and PDAC  
288 carcinogenesis through increased bile acid synthesis. In addition, glutamine metabolism is vastly  
289 reprogrammed to balance the cellular redox homeostasis. Glutamine is sequentially converted to  
290 glutamate and aspartate in the mitochondria, which is shuttled into cytoplasm and eventually  
291 generates NADPH after a series of reactions to maintain redox homeostasis. The regeneration of  
292 NAD<sup>+</sup> as an upstream substrate of NADH production is, therefore, an absolute requirement  
293 PDAC cell survival, particularly when mitochondrial demands escalate. Alterations in glucose  
294 and glutamine metabolism have also been linked with poor response to chemotherapy in PDAC  
295 [68, 71, 75].

296  
297 Reactions in the arachidonic acid metabolism and leukotriene metabolism were observed to  
298 expand their flux space in PDAC. The two distinct branches of arachidonic acid metabolism,  
299 mainly driven by cyclooxygenase-2 (COX-2) and 5-lipoxygenase (5-LOX), were found to have  
300 significantly expanded their flux space in PDAC model. Several studies have reported that  
301 eicosanoid metabolism, especially arachidonic acid (AA) metabolizing enzymes including  
302 prostaglandins and leukotrienes (LT), play an important role in carcinogenesis [56, 57].  
303 Specifically, the eicosanoids formed via COX-2 and 5-LOX metabolism directly contribute to  
304 pancreatic cancer cell proliferation in human[76]. Leukotrienes are also known to initiate  
305 inflammation and mount adaptive immune responses for host defense[77]. Prostaglandins have  
306 also been shown to regulate tumorigenesis in PDAC [78].

307  
308 While the Warburg model explains these shifts to a great extent, especially in increased uptake of  
309 glucose and subsequent increased oxidative phosphorylation, recent studies have shown that the  
310 balance between glycolysis and oxidative phosphorylation may not always be in homeostatic.  
311 Rather, the metabolic reprogramming happening in PDAC is highly dynamic and dependent on  
312 the harsh tumor microenvironment [79]. Therefore, it is imperative to investigate other less  
313 suspected sources of unique metabolic traits of PDAC cells. Simulating the flux space of the  
314 PDAC cell model and comparing that with the healthy pancreas model allows us to examine the

315 distinct changes metabolism in the reaction and pathway level. These observations are concisely  
316 presented in Figure 4.

317  
318 Increased abundance of acetyl-CoA and upregulated mitochondrial carnitine metabolism result in  
319 more carnitine and acyl-carnitine (mostly acetyl-carnitine) in the mitochondria. Carnitine can be  
320 transported to the cytosol and accumulated in biomass. Recent findings have suggested that  
321 carnitine shuttle could be considered as a gridlock to trigger the metabolic flexibility of cancer  
322 cells [80, 81]. Carnitine shuttle system is involved in the bidirectional transport of acyl moieties  
323 between cytosol to mitochondria, thus playing a fundamental role in tuning the switch between  
324 the glucose and fatty acid metabolism. This is crucial for the mitochondrial fatty acid beta-  
325 oxidation and maintaining normal mitochondrial function (balancing the conjugated and free  
326 CoA ratio) [82]. Higher burning of long-chain fatty acids produces increased energy for the cell  
327 to survive [83]. The available acetyl-CoA can be fed into the TCA cycle to produce more energy  
328 or acetyl moieties can be repurposed in the nucleus to recycle acetyl group for histone  
329 acetylation [84]. Thus, the carnitine shuttle system plays a significant role in tumor by supplying  
330 both energetic and biosynthetic demand for cancer cells[84].

331



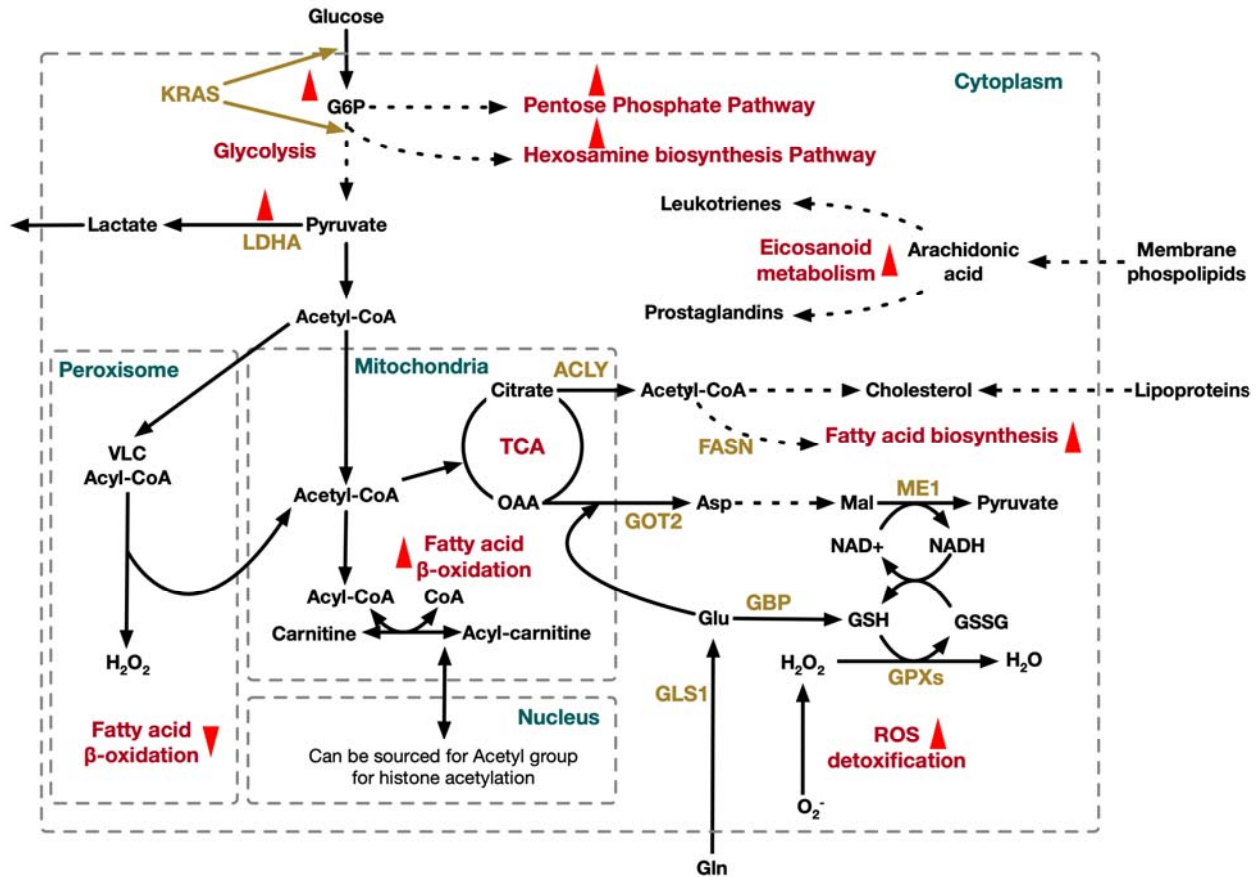

332

333 **Figure 4:** Distinct metabolic features of PDAC cell. ACLY: ATP-citrate lyase; Asp: aspartate;  
 334 FASN: fatty acid synthase; Gln: glutamine; GLS1: glutaminase; Glu: glutamate; GOT: glutamic-  
 335 oxaloacetic transaminase; GPX: glutathione peroxidase; GSH: glutathione reduced; GSSG:  
 336 glutathione oxidized; LDHA: lactate dehydrogenase A; ME: malic enzyme; OAA: oxaloacetic  
 337 acid; TCA: tricarboxylic acid; VLC: very long chain.

338

339 While the mitochondrial beta oxidation pathway reactions primarily showed an expansion in flux  
 340 space, all of the reactions in the peroxisomal beta oxidation pathway shrunk their flux space.  
 341 This is an interesting feature of pancreatic ductal adenocarcinoma, since peroxisomal beta  
 342 oxidation pathway was found to be upregulated in some cancer types [85] and downregulated in  
 343 others [86-88]. The primary differences between fatty acid beta oxidation in mitochondria and  
 344 peroxisome is the chain length at which fatty acids are synthesized and the associated product.  
 345 Mitochondria catalyze the beta oxidation of the majority of the short to long-chain fatty acids,  
 346 and primarily generate energy, while peroxisomes are involved in the beta oxidation of very-  
 347 long-chain fatty acids and generate H<sub>2</sub>O<sub>2</sub> in the process [89]. This means that while

348 mitochondrial beta-oxidation is governed by the energy demands of the cells, peroxisomal beta-  
349 oxidation does not. Peroxisomal beta-oxidation is mostly involved in biosynthesis of very-long-  
350 chain fatty acids and do not produce energy, while the mitochondrial pathway is related to  
351 mostly catabolism and is coupled to ATP production [90]. Therefore, it is expected that the  
352 rapidly proliferating and energy-demanding tumor cells will favor the more energy-efficient  
353 mitochondrial pathways instead of the less required very-long-chain fatty acid-producing  
354 peroxisomal pathways. Furthermore, the reduction of the peroxide byproduct by downregulating  
355 the peroxisomal beta oxidation pathways reduces the oxidative stress, which helps the cancer cell  
356 to survive.

357 Lipid metabolism is essential for cancer progression since it provides the necessary building  
358 blocks for cell membrane formation and produces signaling molecules and substrates for the  
359 posttranslational modification of proteins. However, the role of fatty acids in pancreatic cancer is  
360 complicated and still not very well understood. In PDAC, we observe that reactions participating  
361 in *de novo* fatty acid biosynthesis, fatty acids elongation, and cholesterol biosynthesis pathways  
362 are upregulated, including citrate synthase, ATP citrate lyase, fatty acid synthase, and coenzyme  
363 A reductase. Overexpression of these lipogenic enzymes in PDAC have been reported in some  
364 previous studies as well [91-93]. Of note, increased fatty acid biosynthesis has been shown to  
365 impart poor chemotherapy responsiveness [93]. At the initial step of *de novo* lipid synthesis,  
366 ATP-citrate lyase (ACLY) converts citrate to acetyl-CoA, which is then channeled to cytoplasm.  
367 Acetyl-CoA and malonyl-CoA are coupled to acyl-carrier protein domain of fatty acid synthase  
368 (FASN) and the downstream genes to synthesize mono- and poly-unsaturated as well as  
369 saturated fatty acids [94]. Acetyl-CoA is also converted to cholesterol and cholesterol ester. This  
370 observation agrees with the elevated expression of HMG-CoA (3-hydroxy-3-methylglutaryl-  
371 Coenzym-A) reductase and LDLR (low density lipoprotein receptor) in a mouse model with  
372 PDAC [95]. In addition to higher intercellular lipid synthesis, uptake of extracellular lipids is  
373 also increased in PDAC. This indicates an increased demand of nutrients for rapid proliferation  
374 that the PDAC cells have to meet for *survival*.

375 Lactate dehydrogenase (LDHA) enzyme has shown a reversal of direction and increase in flux  
376 space in PDAC compared to healthy pancreas cell model, in the direction of lactate production.  
377 The overexpression of LDHA in pancreatic cancer and its ability to induce pancreatic cancer cell



378 growth have been reported by Rong et al. in 2013 [96]. In addition, they showed that knocking  
379 down the LDHA in the pancreatic cancer cells significantly inhibited the cell growth revealing  
380 the oncogenic trait of LDHA and its association with poor prognosis [96]. LDHA overexpression  
381 and its association with the poor survival outcome have also been reported [97]. Although a  
382 complete mechanistic insight behind the causal effect of upregulation of LDHA could not be  
383 established yet, it potentially serves as an independent prognostic marker of PDAC.

384

### 385 **Potential Drug Repurposing**

386 The uniqueness in gene expression and metabolic profile in PDAC cells allows for an extended  
387 search for potential drug-gene interactions. In addition to that, the ever-increasing challenges  
388 associated with the therapy-resistance of PDAC have necessitated the repurposing of old drugs.  
389 Leveraging the development in the various data-driven approaches, drug repurposing is  
390 becoming an efficient way of drug discovery which is cost effective. We identified 25 genes  
391 associated with poor prognosis in pancreatic cancer which had an overexpression in PDAC (see  
392 Supplementary information 6 for a complete list). In Figure 5, These genes are the shown to be  
393 associated with several drug currently in use in human, which are at different stages of the  
394 approval process. The edges connecting the drug to the genes indicated the evidence of  
395 repressive effects on the genes, according to DrugBank Pharmaco-transcriptomic database [98].  
396 Several of these drugs have potential synergistic association between each other, as shown in  
397 Figure 5. These non-oncology drugs can potentially target not only known but also hitherto  
398 unknown vulnerabilities in pancreatic cancer. While many of the drugs are either approved (*e.g.*,  
399 Ofloxacin, Ciprofloxacin) or at the investigational stage (*e.g.*, Puromycin) for treating other  
400 diseases in the human body, some of these drugs (*e.g.*, troglitazone) has been withdrawn from  
401 the market due to risk of severe liver failure that can be fatal [99, 100]. Nonetheless, they are still  
402 included in this association study, since newer studies have revealed anti-proliferative activities  
403 of the derivatives of this drug in other cancer types [101-104], which can result in an improved  
404 benefit-to-risk ratio for these drugs as well as suggest new drug combinations for reduced  
405 hepatotoxicity [105].

406

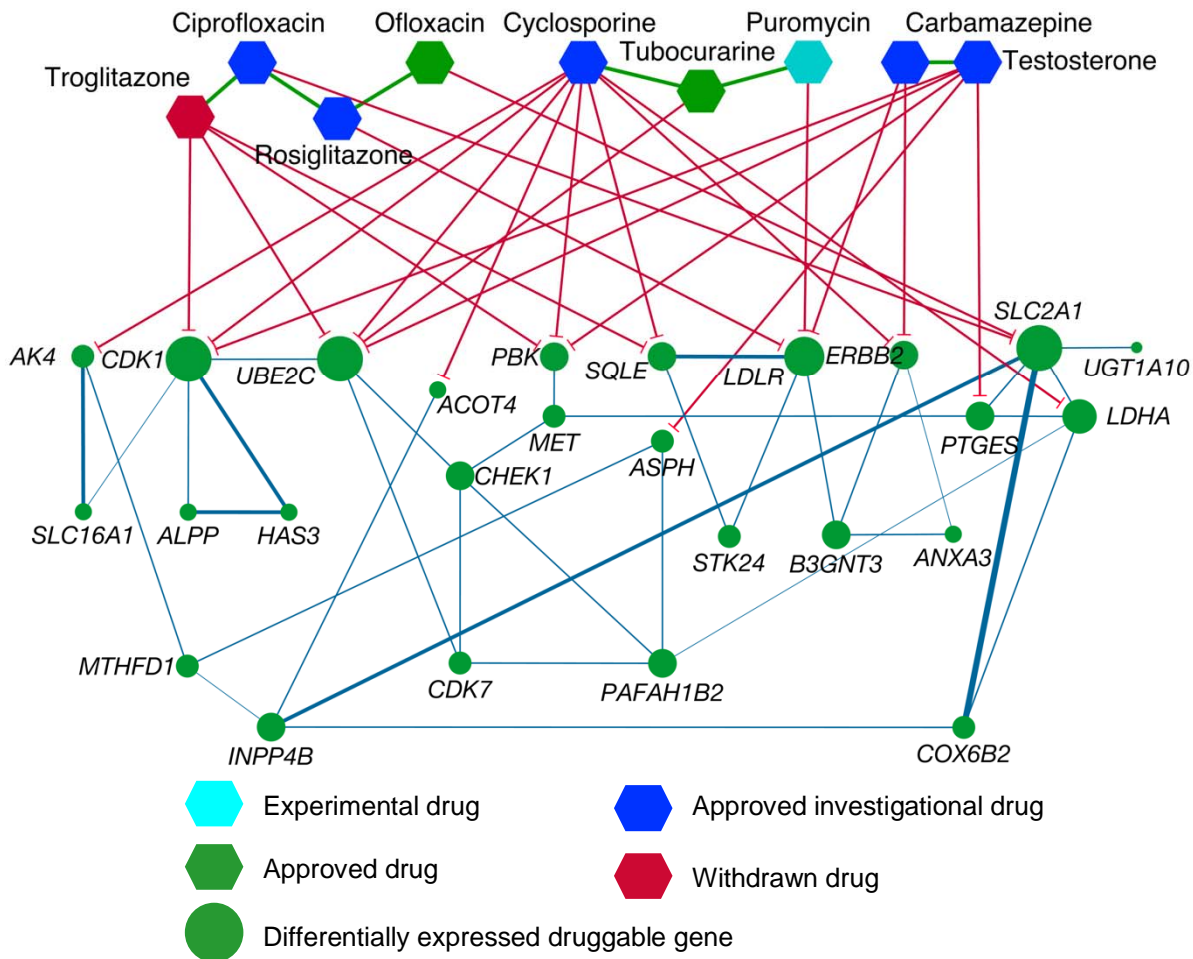

**Figure 5:** Potential drug interactions with upregulated genes in PDAC with poor prognosis. Edge thickness between the genes denote the correlation coefficient and the size of the nodes denote the magnitude of the gene expression fold change value in PDAC.

Since these drug-gene association are predicted in different tissue or disease systems and are a result of text mining through literature, we furthered our analysis of these associations by validating their effect on the fitness of the pancreatic cancer cell. To this end, we checked the inhibition effect on PDAC biomass when each of these genes are knocked out. The strongest growth inhibiting effect was observed when *SLC2A1* was knocked out, resulting in a no-growth phenotype during out model simulations. *SLC2A1* encodes major small sugar transporter across cellular membrane and between cellular organelles[106-110]. With its broad substrate specificity, *SLC2A1* can transport a wide range of aldoses including both pentoses and hexoses[110]. This is not only a rate limiting factor in sugar transport [107, 111], promoting

424 aggressive tumor proliferation but also have been observed to be deregulated in pancreatic ductal  
425 adenocarcinoma [112]. Therefore, *SLC2A1* appears to be a high-confidence target for  
426 repositioning of the drugs repressing its expression, including fluoroquinolone-based antibiotics  
427 Ofloxacin and Ciprofloxacin. Other moderately growth-inhibiting genetic perturbations include  
428 monocarboxylate transporter (*SLC16A1*), which is responsible for catalyzing the proton-  
429 linked transport of monocarboxylates such as L-lactate, pyruvate, and the ketone bodies [113];  
430 Methylenetetrahydrofolate Dehydrogenase (*MTHFD1*), which is closely coupled with nuclear *de*  
431 *novo* thymidylate biosynthesis [114]; and Cytochrome C Oxidase Subunit 6B2 (*COX6B2*), which  
432 accelerates oxidative phosphorylation, NAD<sup>+</sup> generation, and cell proliferation [115].

433  
434 To adapt to severe metabolic constraints, PDAC cells rely on specific metabolic reprogramming,  
435 thus offering innovative therapeutic strategies in the future. In this study, we attempted to  
436 identify a few poorly explored metabolic traits of PDAC cells, which can potentially complement  
437 the ongoing effort of finding novel therapeutic targets against pancreatic cancer. While many  
438 aspects of the pancreatic tumor progression have been studied with help of transcriptomics,  
439 proteomics, and metabolomics, this metabolic model-based study helps unravel the reactome  
440 layer of biochemical features that are associated with PDAC. While this systems-level metabolic  
441 analysis incorporates a relatively small sample size of clinical data, this allows us to assess the  
442 genome-scale changes in metabolism under tumor progression, and therefore can unravel  
443 previously unknown mechanistic insights into cancer cell proliferation as well as identify  
444 potential drug associations and synergistic drug combinations that can be repurposed. A better  
445 understanding of the metabolic dependencies needed to survive harsh conditions will uncover  
446 metabolic vulnerabilities and guide alternative therapeutic strategies.

447

## 448 **Methods**

### 449 **Transcriptomic data processing**

450 Transcriptomic data of 18 individuals (16 PDAC, 2 healthy normal) was obtained from the  
451 Cancer genome atlas (<https://www.cancer.gov/tcga>). The Fragments Per Kilobase of transcript  
452 per Million mapped reads were used as the input of differential gene expression analysis. The  
453 transcriptomic data included FPKM information for 60,483 genes for each of the samples. The  
454 FPKM values were filtered to exclude the genes with zero expression values throughout samples.

455 The DESeq algorithm in R software package “Bioconductor” was used for differential gene  
456 expression analysis [116]. DESeq employs negative binomial distribution and a shrinkage  
457 estimator for the distribution’s variance methods to test for differential expression [116]. Genes  
458 with a  $\log_2$  (foldchange) value of 2 or higher were considered overexpressed and genes with a  
459  $\log_2$  (foldchange) value of -2 or lower were considered underexpressed, while satisfying an  
460 adjusted p-value of  $<0.05$  [117]. Heatmap was generated using Morpheus  
461 (<https://software.broadinstitute.org/morpheus>) from the Broad Institute.

462

### 463 **Co-expression analysis with regulatory genes**

464 Of the 490 differentially expressed genes, two over-expressed genes (*NR1D1* and *FOSL1*) were  
465 identified as regulatory genes using the Human Protein Atlas. A list of the genes regulated by  
466 each of these genes was obtained from RegNetwork[118]. The expression patterns of the two  
467 regulatory genes and their targets were examined to develop gene co-expression networks with  
468 the goal to identify highly co-expressed genes that could be considered regulators for genes  
469 expressed in PDAC. A threshold of  $>0.7$  was used on Pearson's correlation coefficient with a p-  
470 value of  $<0.05$  for the development of the co-expression networks. Correlation clusters were  
471 developed grouping highly correlated genes to produce the co-expression networks. Network  
472 visualization was performed in Cytoscape[119] version 3.8.2 with manual repositioning. Gene  
473 expression data was visualized with varying node sizes, and correlation coefficients between  
474 genes were visualized with edge color and thickness.

475

### 476 **Preliminary pancreas metabolic reconstruction**

477 A genome-scale metabolic model of a pancreatic cell describing reaction stoichiometry,  
478 directionality, and gene-protein-reaction (GPR) association was built by mapping these  
479 transcriptomic datasets to the latest global human metabolic model, Human1[47]. This global  
480 human model contains 13,417 reactions, 10,135 metabolites, and 3,628 genes, as of the github  
481 repository down in December 2020. This tissue-specific pancreas metabolic reconstruction was  
482 obtained from the Human1 model using the Integrative Metabolic Analysis Tool (iMAT)[53].  
483 First, the reactions from the Human1 model were assigned artificial “expression values” (see Zur  
484 et al, 2010[53] for details) based on their associated gene and its corresponding expression  
485 values in the TCGA data. These expression values were then grouped into 3 categories: highly

486 expressed, moderately expressed, and lowly expressed. Expression values greater than half a  
487 standard deviation above the mean were considered highly expressed and assigned a value of 1.  
488 Expression values less than half a standard deviation below the mean were considered lowly  
489 expressed and assigned a value of -1. Expression values that fell within a half a standard  
490 deviation of the mean were considered moderately expressed and assigned a value of 0. The  
491 expression for the Human1 biomass reaction was manually set to 1 so the biomass equation and  
492 all the other necessary reactions producing biomass precursors are included in the model. The  
493 iMAT algorithm then generated a model using the reaction expression information and reactions  
494 in the Human1 model.

495

### 496 **Flux Balance Analysis**

497 Flux Balance Analysis (FBA)[120] was used to analyze the model performance during the  
498 different stages of refinement. The model was represented by a stoichiometric matrix, where the  
499 columns were representative of metabolites, and the rows representative of reactions. Constraints  
500 were imposed on the reactions given by upper and lower bounds for each based on nutrient  
501 availability and other conditions. FBA gives the flux value for each reaction in the model  
502 according to the following optimization formulation:

$$\begin{aligned} & \text{maximize } (v_j) \quad v_{biomass} \\ & \text{subject to} \\ & \sum_{j \in J^k} S_{ij} \cdot v_j = 0 \quad \forall i \in I \\ & LB_j \leq v_j \leq UB_j \quad \forall j \in J \end{aligned}$$

503 In this formulation,  $I$  is the set of metabolites and  $J$  is the set of reactions in the model.  $S_{ij}$  is the  
504 stoichiometric coefficient matrix representing a model with  $i$  metabolites and  $j$  reactions, and  $v_j$  is  
505 the flux value of each reaction. The objective function,  $v_{biomass}$ , is representative of the growth  
506 rate of an individual cell.  $LB_j$  and  $UB_j$  are the minimum and maximum flux values allowed for  
507 each reaction.

508

### 509 **Model curation**

510 The consensus model was curated through the classic design-build-test-refine cycle[121] to  
511 accurately reflect the metabolic capabilities of a pancreatic cell. Three reactions contained

512 imbalances either in their stoichiometries or molecular formulas, and these imbalances were  
513 rectified. For reactions with imbalances caused by stoichiometric inaccuracies, changes were  
514 made to the stoichiometric coefficient matrix of the model. For reactions whose imbalances were  
515 due to incorrect molecular formulas, fixes were applied to the metabolic formula section of the  
516 model (see details in Supplementary information 2).

517  
518 Thermodynamically infeasible cycles (TICs) are groups of reactions whose products, reactants,  
519 and directionality create a loop that allows unlimited flux to pass through each reaction, yielding  
520 no net consumption or production of metabolites. The presence of these cycles allows for many  
521 reactions in the model to occur at a very high rate even through the nutritional input to the model  
522 is negligible (or zero), which is unrealistic. These reactions are called unbounded reactions. It is  
523 important to eliminate these cycles to ensure the flux values for each reaction are  
524 thermodynamically feasible. Flux Variability Analysis (FVA) was performed on the model to  
525 identify mathematically possible flux ranges of the reactions in the model as well as identify the  
526 unbounded reactions. Unbounded reactions are characterized by flux distributions that hit the  
527 upper and/or lower bounds in FVA when all the metabolic uptake reactions are turned off. This  
528 initial analysis revealed 1444 unbounded reactions in the model, across multiple pathways  
529 including transport, fatty acid oxidation, nucleotide metabolism, and drug metabolism. The  
530 thermodynamically infeasible cycles comprising these unbounded reactions were identified using  
531 OptFill[55]. OptFill identifies TICs through iteratively identifying the smallest number of  
532 reactions with nonzero flux for which the sum of their fluxes is 0. All uptakes are turned off for  
533 OptFill so that all reactions carrying high flux are involved in a TIC. These cycles were  
534 eliminated by i) removing duplicate reactions from the model(s), ii) restricting reaction  
535 directionality if there is literature evidence of thermodynamic information, iii) removing  
536 erroneous reactions, and iv) using correct cofactors in reactions (for example NAD vs NADP) if  
537 that information is available. (complete details in Supplementary information 2). 932 reactions  
538 were modified in total. 609 reactions were turned off because they were duplicates of other  
539 reactions or lumped reactions. 23 reactions that were initially irreversible were made reversible if  
540 there was literature evidence indicating their reversibility. 286 reactions that were initially  
541 reversible were made irreversible in the forward direction, and 14 initially reversible directions



542 were made irreversible in the backward direction. When turning reactions off to fix cycles, it was  
543 ensured that all essential reactions remained active in the model.

544

#### 545 **Hypergeometric test for reaction enrichment analysis**

546 Hypergeometric enrichment test was used to identify reaction pathways which are  
547 overrepresented in the set of reactions with altered flux space. The list of reactions with changing  
548 flux spaces obtained from running flux variability analysis was used to conduct a two-tailed  
549 hypergeometric test. This test was used to obtain the pathways showing significant  
550 representation in the list of altered reactions.

$$P(X = k) = \frac{\binom{K}{k} \binom{N - K}{n - k}}{\binom{N}{n}}$$

551

552 In this equation,  $P(X=k)$  is the probability that there are  $k$  reactions by chance with altered flux  
553 space in a given subsystem.  $K$  is the total number of reactions in a given subsystem,  $N$  is the total  
554 number of reactions in the model, and  $n$  is the total number of reactions in the model with altered  
555 flux space. The hypergeometric test was conducted for overrepresentation in each pathway in the  
556 model. For  $P(X=k) < 0.05$ , it is likely that the subsystem is over-represented due to a high  
557 number of altered reactions in the pathway rather than by chance. The p-values were then  
558 subjected to multiple-hypothesis correction using Benjamini-Hochberg method[122] using False  
559 Discovery Rate with  $\alpha=0.05$ . From this, a list of pathways in the model most affected by PDAC  
560 was obtained.

561

#### 562 **Drug interaction analysis**

563 From the list of differentially expressed genes in the PDAC model, those associated with poor  
564 prognosis were identified using the Human Protein Atlas (<http://www.proteinatlas.org>). The  
565 differentially expressed genes associated with poor prognosis were then identified as potential  
566 therapeutic targets. For each of these genes, a list of drugs and their activation or repression  
567 effects were obtained from the DrugBank Pharmaco-transcriptomic database[98].

568

#### 569 **Software and hardware resources**

570 The General Algebraic Modeling System (GAMS)[123] version 24.7.4 was used to run FBA,  
571 FVA, and the OptFill algorithm on the model. GAMS was run on a high-performance cluster  
572 computing system at the Holland Computing Center of the University of Nebraska-Lincoln. The  
573 COBRA Toolbox[124, 125] version 3.0 in Matlab version 9.6.0.1174912 (R2019a) was used to  
574 run iMAT[53], identify essential reactions and reaction imbalances, and run FBA and FVA on  
575 the model.

576

### 577 **Author contributions**

578 **Mohammad Mazharul Islam:** Data Curation, Formal Analysis, Investigation, Methodology,  
579 Resources, Software, Validation, Visualization, Writing – Original Draft Preparation

580

581 **Andrea Goertzen:** Formal Analysis, Methodology, Resources, Software, Writing – Original  
582 Draft Preparation

583

584 **Pankaj K. Singh:** Funding Acquisition, Writing – Review & Editing

585

586 **Rajib Saha:** Conceptualization, Funding Acquisition, Project Administration, Supervision,  
587 Writing – Review & Editing

588

### 589 **Competing interests**

590 The authors declare no competing interest for the presented work.

591

### 592 **Data availability**

593 All data generated or analyzed during this study are included in this published article and its  
594 supplementary information files.

### 595 **Supporting Information**

596 Supplementary information 1: Differential gene expression analysis results.

597 Supplementary information 2: List of reactions removed, redirected, or balanced during  
598 model refinement.



599 Supplementary information 3: Genome-scale metabolic model of the healthy pancreas  
600 cell in Systems Biology markup Language level 3 version 1

601 Supplementary information 4: Genome-scale metabolic model of the PDAC cells in  
602 Systems Biology markup Language level 3 version 1

603 Supplementary information 5: Pathways with the biggest fraction of reaction fluxes  
604 significantly upregulated and downregulated

605 Supplementary information 6: Genes associated with poor prognosis in pancreatic cancer  
606 which had a significant differential expression in PDAC

607

608

609

610

611 References:

612

613 1. Abrego J, Gunda V, Vernucci E, Shukla SK, King RJ, Dasgupta A, et al. GOT1-mediated  
614 anaplerotic glutamine metabolism regulates chronic acidosis stress in pancreatic cancer cells.  
615 Cancer Lett. 2017;400:37-46. Epub 2017/04/30. doi: 10.1016/j.canlet.2017.04.029. PubMed  
616 PMID: 28455244; PubMed Central PMCID: PMC5488721.

617 2. Sarantis P, Koustas E, Papadimitropoulou A, Papavassiliou AG, Karamouzis MV.  
618 Pancreatic ductal adenocarcinoma: Treatment hurdles, tumor microenvironment and  
619 immunotherapy. World J Gastrointest Oncol. 2020;12(2):173-81. Epub 2020/02/28. doi:  
620 10.4251/wjgo.v12.i2.173. PubMed PMID: 32104548; PubMed Central PMCID:  
621 PMC7031151.

622 3. Das S, Batra SK. Pancreatic cancer metastasis: are we being pre-EMTed? Current  
623 pharmaceutical design. 2015;21(10):1249-55. Epub 2014/12/17. doi:  
624 10.2174/138161282166614121115234. PubMed PMID: 25506899; PubMed Central PMCID:  
625 PMC4457289.

626 4. Hezel AF, Kimmelman AC, Stanger BZ, Bardeesy N, Depinho RA. Genetics and biology  
627 of pancreatic ductal adenocarcinoma. Genes Dev. 2006;20(10):1218-49. Epub 2006/05/17. doi:  
628 10.1101/gad.1415606. PubMed PMID: 16702400.

- 629 5. Koppenol WH, Bounds PL, Dang CV. Otto Warburg's contributions to current concepts  
630 of cancer metabolism. *Nature reviews Cancer*. 2011;11(5):325-37. Epub 2011/04/22. doi:  
631 10.1038/nrc3038. PubMed PMID: 21508971.
- 632 6. Teague A, Lim KH, Wang-Gillam A. Advanced pancreatic adenocarcinoma: a review of  
633 current treatment strategies and developing therapies. *Ther Adv Med Oncol*. 2015;7(2):68-84.  
634 Epub 2015/03/11. doi: 10.1177/1758834014564775. PubMed PMID: 25755680; PubMed  
635 Central PMCID: PMCPMC4346211.
- 636 7. Grasso C, Jansen G, Giovannetti E. Drug resistance in pancreatic cancer: Impact of  
637 altered energy metabolism. *Crit Rev Oncol Hematol*. 2017;114:139-52. Epub 2017/05/10. doi:  
638 10.1016/j.critrevonc.2017.03.026. PubMed PMID: 28477742.
- 639 8. Nakano Y, Tanno S, Koizumi K, Nishikawa T, Nakamura K, Minoguchi M, et al.  
640 Gemcitabine chemoresistance and molecular markers associated with gemcitabine transport and  
641 metabolism in human pancreatic cancer cells. *British journal of cancer*. 2007;96(3):457-63. Epub  
642 2007/01/17. doi: 10.1038/sj.bjc.6603559. PubMed PMID: 17224927; PubMed Central PMCID:  
643 PMCPMC2360025.
- 644 9. Nakahira S, Nakamori S, Tsujie M, Takahashi Y, Okami J, Yoshioka S, et al.  
645 Involvement of ribonucleotide reductase M1 subunit overexpression in gemcitabine resistance of  
646 human pancreatic cancer. *Int J Cancer*. 2007;120(6):1355-63. Epub 2006/11/30. doi:  
647 10.1002/ijc.22390. PubMed PMID: 17131328.
- 648 10. Kurata N, Fujita H, Ohuchida K, Mizumoto K, Mahawithitwong P, Sakai H, et al.  
649 Predicting the chemosensitivity of pancreatic cancer cells by quantifying the expression levels of  
650 genes associated with the metabolism of gemcitabine and 5-fluorouracil. *Int J Oncol*.  
651 2011;39(2):473-82. Epub 2011/05/28. doi: 10.3892/ijo.2011.1058. PubMed PMID: 21617862.
- 652 11. Valsecchi ME, Holdbrook T, Leiby BE, Pequignot E, Littman SJ, Yeo CJ, et al. Is there a  
653 role for the quantification of RRM1 and ERCC1 expression in pancreatic ductal  
654 adenocarcinoma? *BMC Cancer*. 2012;12:104. Epub 2012/03/23. doi: 10.1186/1471-2407-12-  
655 104. PubMed PMID: 22436573; PubMed Central PMCID: PMCPMC3364898.
- 656 12. Duxbury MS, Ito H, Benoit E, Waseem T, Ashley SW, Whang EE. RNA interference  
657 demonstrates a novel role for integrin-linked kinase as a determinant of pancreatic  
658 adenocarcinoma cell gemcitabine chemoresistance. *Clinical cancer research : an official journal  
659 of the American Association for Cancer Research*. 2005;11(9):3433-8. Epub 2005/05/04. doi:

- 660 10.1158/1078-0432.CCR-04-1510. PubMed PMID: 15867245; PubMed Central PMCID:  
661 PMCPMC2734187.
- 662 13. Waddell N, Pajic M, Patch AM, Chang DK, Kassahn KS, Bailey P, et al. Whole genomes  
663 redefine the mutational landscape of pancreatic cancer. *Nature*. 2015;518(7540):495-501. Epub  
664 2015/02/27. doi: 10.1038/nature14169. PubMed PMID: 25719666; PubMed Central PMCID:  
665 PMCPMC4523082.
- 666 14. Cancer Genome Atlas Research Network. Electronic address aadhe, Cancer Genome  
667 Atlas Research N. Integrated Genomic Characterization of Pancreatic Ductal Adenocarcinoma.  
668 *Cancer Cell*. 2017;32(2):185-203 e13. Epub 2017/08/16. doi: 10.1016/j.ccell.2017.07.007.  
669 PubMed PMID: 28810144; PubMed Central PMCID: PMCPMC5964983.
- 670 15. Kasthuber ER, Lowe SW. Putting p53 in Context. *Cell*. 2017;170(6):1062-78. Epub  
671 2017/09/09. doi: 10.1016/j.cell.2017.08.028. PubMed PMID: 28886379; PubMed Central  
672 PMCID: PMCPMC5743327.
- 673 16. Cox AD, Fesik SW, Kimmelman AC, Luo J, Der CJ. Drugging the undruggable RAS:  
674 Mission possible? *Nat Rev Drug Discov*. 2014;13(11):828-51. Epub 2014/10/18. doi:  
675 10.1038/nrd4389. PubMed PMID: 25323927; PubMed Central PMCID: PMCPMC4355017.
- 676 17. Moore MJ, Goldstein D, Hamm J, Figer A, Hecht JR, Gallinger S, et al. Erlotinib plus  
677 gemcitabine compared with gemcitabine alone in patients with advanced pancreatic cancer: a  
678 phase III trial of the National Cancer Institute of Canada Clinical Trials Group. *J Clin Oncol*.  
679 2007;25(15):1960-6. Epub 2007/04/25. doi: 10.1200/JCO.2006.07.9525. PubMed PMID:  
680 17452677.
- 681 18. Ruess DA, Heynen GJ, Ciecieski KJ, Ai J, Berninger A, Kabacaoglu D, et al. Mutant  
682 KRAS-driven cancers depend on PTPN11/SHP2 phosphatase. *Nat Med*. 2018;24(7):954-60.  
683 Epub 2018/05/29. doi: 10.1038/s41591-018-0024-8. PubMed PMID: 29808009.
- 684 19. Eser S, Reiff N, Messer M, Seidler B, Gottschalk K, Dobler M, et al. Selective  
685 requirement of PI3K/PDK1 signaling for Kras oncogene-driven pancreatic cell plasticity and  
686 cancer. *Cancer Cell*. 2013;23(3):406-20. Epub 2013/03/05. doi: 10.1016/j.ccr.2013.01.023.  
687 PubMed PMID: 23453624.
- 688 20. Fiskus W, Sharma S, Saha S, Shah B, Devaraj SG, Sun B, et al. Pre-clinical efficacy of  
689 combined therapy with novel beta-catenin antagonist BC2059 and histone deacetylase inhibitor

- 690 against AML cells. *Leukemia*. 2015;29(6):1267-78. Epub 2014/12/09. doi:  
691 10.1038/leu.2014.340. PubMed PMID: 25482131; PubMed Central PMCID: PMC4456205.
- 692 21. Wolpin BM, Hezel AF, Abrams T, Blasztkowsky LS, Meyerhardt JA, Chan JA, et al. Oral  
693 mTOR inhibitor everolimus in patients with gemcitabine-refractory metastatic pancreatic cancer.  
694 *J Clin Oncol*. 2009;27(2):193-8. Epub 2008/12/03. doi: 10.1200/JCO.2008.18.9514. PubMed  
695 PMID: 19047305; PubMed Central PMCID: PMC2645085.
- 696 22. Javle MM, Shroff RT, Xiong H, Varadhachary GA, Fogelman D, Reddy SA, et al.  
697 Inhibition of the mammalian target of rapamycin (mTOR) in advanced pancreatic cancer: results  
698 of two phase II studies. *BMC Cancer*. 2010;10:368. Epub 2010/07/16. doi: 10.1186/1471-2407-  
699 10-368. PubMed PMID: 20630061; PubMed Central PMCID: PMC2910694.
- 700 23. Orth M, Metzger P, Gerum S, Mayerle J, Schneider G, Belka C, et al. Pancreatic ductal  
701 adenocarcinoma: biological hallmarks, current status, and future perspectives of combined  
702 modality treatment approaches. *Radiat Oncol*. 2019;14(1):141. Epub 2019/08/10. doi:  
703 10.1186/s13014-019-1345-6. PubMed PMID: 31395068; PubMed Central PMCID:  
704 PMC6688256.
- 705 24. Raskevicius V, Mikalayeva V, Antanaviciute I, Cesleviciene I, Skeberdis VA, Kairys V,  
706 et al. Genome scale metabolic models as tools for drug design and personalized medicine. *PloS*  
707 *one*. 2018;13(1):e0190636. Epub 2018/01/06. doi: 10.1371/journal.pone.0190636. PubMed  
708 PMID: 29304175; PubMed Central PMCID: PMC5755790.
- 709 25. Bordel S. Constraint based modeling of metabolism allows finding metabolic cancer  
710 hallmarks and identifying personalized therapeutic windows. *Oncotarget*. 2018;9(28):19716-29.  
711 Epub 2018/05/08. doi: 10.18632/oncotarget.24805. PubMed PMID: 29731977; PubMed Central  
712 PMCID: PMC5929420.
- 713 26. Zhang C, Hua Q. Applications of Genome-Scale Metabolic Models in Biotechnology and  
714 Systems Medicine. *Frontiers in physiology*. 2015;6:413. Epub 2016/01/19. doi:  
715 10.3389/fphys.2015.00413. PubMed PMID: 26779040; PubMed Central PMCID:  
716 PMC4703781.
- 717 27. Dunphy LJ, Papin JA. Biomedical applications of genome-scale metabolic network  
718 reconstructions of human pathogens. *Curr Opin Biotechnol*. 2017;51:70-9. Epub 2017/12/11.  
719 doi: 10.1016/j.copbio.2017.11.014. PubMed PMID: 29223465; PubMed Central PMCID:  
720 PMC5991985.

- 721 28. Agren R, Mardinoglu A, Asplund A, Kampf C, Uhlen M, Nielsen J. Identification of  
722 anticancer drugs for hepatocellular carcinoma through personalized genome-scale metabolic  
723 modeling. *Mol Syst Biol.* 2014;10:721. Epub 2014/03/22. doi: 10.1002/msb.145122. PubMed  
724 PMID: 24646661; PubMed Central PMCID: PMC4017677.
- 725 29. Mienda BS, Salihu R, Adamu A, Idris S. Genome-scale metabolic models as platforms  
726 for identification of novel genes as antimicrobial drug targets. *Future Microbiol.* 2018;13:455-67.  
727 Epub 2018/02/23. doi: 10.2217/fmb-2017-0195. PubMed PMID: 29469596.
- 728 30. Bernstein DB, Sulheim S, Almaas E, Segrè D. Addressing uncertainty in genome-scale  
729 metabolic model reconstruction and analysis. *Genome Biology.* 2021;22(1):64. doi:  
730 10.1186/s13059-021-02289-z.
- 731 31. Cardoso JGR, Andersen MR, Herrgård MJ, Sonnenschein N. Analysis of Genetic  
732 Variation and Potential Applications in Genome-Scale Metabolic Modeling. *Frontiers in*  
733 *Bioengineering and Biotechnology.* 2015;3(13). doi: 10.3389/fbioe.2015.00013.
- 734 32. Castillo S, Patil KR, Jouhten P. Yeast Genome-Scale Metabolic Models for Simulating  
735 Genotype–Phenotype Relations. In: Sá-Correia I, editor. *Yeasts in Biotechnology and Human*  
736 *Health: Physiological Genomic Approaches.* Cham: Springer International Publishing; 2019. p.  
737 111-33.
- 738 33. Lewis NE, Nagarajan H, Palsson BO. Constraining the metabolic genotype-phenotype  
739 relationship using a phylogeny of in silico methods. *Nat Rev Microbiol.* 2012;10(4):291-305.  
740 Epub 2012/03/01. doi: 10.1038/nrmicro2737. PubMed PMID: 22367118; PubMed Central  
741 PMCID: PMC3536058.
- 742 34. Matthews ML, Marshall-Colón A. Multiscale plant modeling: from genome to phenome  
743 and beyond. *Emerging Topics in Life Sciences.* 2021. doi: 10.1042/ETLS20200276.
- 744 35. O'Brien EJ, Monk JM, Palsson BO. Using Genome-scale Models to Predict Biological  
745 Capabilities. *Cell.* 2015;161(5):971-87. Epub 2015/05/23. doi: 10.1016/j.cell.2015.05.019.  
746 PubMed PMID: 26000478; PubMed Central PMCID: PMC4451052.
- 747 36. Zhang C, Aldrees M, Arif M, Li X, Mardinoglu A, Aziz MA. Elucidating the  
748 Reprogramming of Colorectal Cancer Metabolism Using Genome-Scale Metabolic Modeling.  
749 *Front Oncol.* 2019;9:681. Epub 2019/08/17. doi: 10.3389/fonc.2019.00681. PubMed PMID:  
750 31417867; PubMed Central PMCID: PMC6682621.

- 751 37. Turanli B, Zhang C, Kim W, Benfeitas R, Uhlen M, Arga KY, et al. Discovery of  
752 therapeutic agents for prostate cancer using genome-scale metabolic modeling and drug  
753 repositioning. *EBioMedicine*. 2019;42:386-96. Epub 2019/03/25. doi:  
754 10.1016/j.ebiom.2019.03.009. PubMed PMID: 30905848; PubMed Central PMCID:  
755 PMCPMC6491384.
- 756 38. Nilsson A, Nielsen J. Genome scale metabolic modeling of cancer. *Metab Eng*.  
757 2017;43(Pt B):103-12. Epub 2016/11/09. doi: 10.1016/j.ymben.2016.10.022. PubMed PMID:  
758 27825806.
- 759 39. Ghaffari P, Mardinoglu A, Asplund A, Shoaie S, Kampf C, Uhlen M, et al. Identifying  
760 anti-growth factors for human cancer cell lines through genome-scale metabolic modeling. *Sci*  
761 *Rep*. 2015;5:8183. Epub 2015/02/03. doi: 10.1038/srep08183. PubMed PMID: 25640694;  
762 PubMed Central PMCID: PMCPMC4313100.
- 763 40. Jerby L, Ruppin E. Predicting drug targets and biomarkers of cancer via genome-scale  
764 metabolic modeling. *Clinical cancer research : an official journal of the American Association*  
765 *for Cancer Research*. 2012;18(20):5572-84. Epub 2012/10/17. doi: 10.1158/1078-0432.CCR-12-  
766 1856. PubMed PMID: 23071359.
- 767 41. Katzir R, Polat IH, Harel M, Katz S, Foguet C, Selivanov VA, et al. The landscape of  
768 tiered regulation of breast cancer cell metabolism. *Sci Rep-Uk*. 2019;9(1):17760. doi:  
769 10.1038/s41598-019-54221-y.
- 770 42. Agren R, Bordel S, Mardinoglu A, Pornputtapong N, Nookaew I, Nielsen J.  
771 Reconstruction of genome-scale active metabolic networks for 69 human cell types and 16  
772 cancer types using INIT. *PLoS computational biology*. 2012;8(5):e1002518. Epub 2012/05/23.  
773 doi: 10.1371/journal.pcbi.1002518. PubMed PMID: 22615553; PubMed Central PMCID:  
774 PMCPMC3355067.
- 775 43. Gatto F, Ferreira R, Nielsen J. Pan-cancer analysis of the metabolic reaction network.  
776 *Metabolic Engineering*. 2020;57:51-62. doi: <https://doi.org/10.1016/j.ymben.2019.09.006>.
- 777 44. Roy M, Finley SD. Computational Model Predicts the Effects of Targeting Cellular  
778 Metabolism in Pancreatic Cancer. *Frontiers in physiology*. 2017;8(217). doi:  
779 10.3389/fphys.2017.00217.
- 780 45. Kumar A, Suthers PF, Maranas CD. MetRxn: a knowledgebase of metabolites and  
781 reactions spanning metabolic models and databases. *BMC bioinformatics*. 2012;13:6. doi:



- 782 10.1186/1471-2105-13-6. PubMed PMID: 22233419; PubMed Central PMCID:  
783 PMCPMC3277463.
- 784 46. Saha R, Chowdhury A, Maranas CD. Recent advances in the reconstruction of metabolic  
785 models and integration of omics data. *Curr Opin Biotechnol.* 2014;29:39-45. doi:  
786 10.1016/j.copbio.2014.02.011. PubMed PMID: 24632194.
- 787 47. Robinson JL, Kocabas P, Wang H, Cholley PE, Cook D, Nilsson A, et al. An atlas of  
788 human metabolism. *Science signaling.* 2020;13(624). Epub 2020/03/27. doi:  
789 10.1126/scisignal.aaz1482. PubMed PMID: 32209698; PubMed Central PMCID:  
790 PMCPMC7331181.
- 791 48. Brunk E, Sahoo S, Zielinski DC, Altunkaya A, Drager A, Mih N, et al. Recon3D enables  
792 a three-dimensional view of gene variation in human metabolism. *Nature biotechnology.*  
793 2018;36(3):272-81. Epub 2018/02/20. doi: 10.1038/nbt.4072. PubMed PMID: 29457794;  
794 PubMed Central PMCID: PMCPMC5840010.
- 795 49. Duarte NC, Becker SA, Jamshidi N, Thiele I, Mo ML, Vo TD, et al. Global  
796 reconstruction of the human metabolic network based on genomic and bibliomic data. *Proc Natl*  
797 *Acad Sci U S A.* 2007;104(6):1777-82. Epub 2007/02/03. doi: 10.1073/pnas.0610772104.  
798 PubMed PMID: 17267599; PubMed Central PMCID: PMCPMC1794290.
- 799 50. Thiele I, Swainston N, Fleming RM, Hoppe A, Sahoo S, Aurich MK, et al. A  
800 community-driven global reconstruction of human metabolism. *Nature biotechnology.*  
801 2013;31(5):419-25. Epub 2013/03/05. doi: 10.1038/nbt.2488. PubMed PMID: 23455439;  
802 PubMed Central PMCID: PMCPMC3856361.
- 803 51. Mardinoglu A, Agren R, Kampf C, Asplund A, Nookaew I, Jacobson P, et al. Integration  
804 of clinical data with a genome-scale metabolic model of the human adipocyte. *Mol Syst Biol.*  
805 2013;9:649. Epub 2013/03/21. doi: 10.1038/msb.2013.5. PubMed PMID: 23511207; PubMed  
806 Central PMCID: PMCPMC3619940.
- 807 52. Mardinoglu A, Agren R, Kampf C, Asplund A, Uhlen M, Nielsen J. Genome-scale  
808 metabolic modelling of hepatocytes reveals serine deficiency in patients with non-alcoholic fatty  
809 liver disease. *Nature communications.* 2014;5:3083. Epub 2014/01/15. doi:  
810 10.1038/ncomms4083. PubMed PMID: 24419221.

- 811 53. Zur H, Ruppin E, Shlomi T. iMAT: an integrative metabolic analysis tool.  
812 Bioinformatics. 2010;26(24):3140-2. Epub 2010/11/18. doi: 10.1093/bioinformatics/btq602.  
813 PubMed PMID: 21081510.
- 814 54. Mahadevan R, Schilling CH. The effects of alternate optimal solutions in constraint-  
815 based genome-scale metabolic models. Metab Eng. 2003;5. doi: 10.1016/j.ymben.2003.09.002.
- 816 55. Schroeder WL, Saha R. OptFill: A Tool for Infeasible Cycle-Free Gapfilling of  
817 Stoichiometric Metabolic Models. iScience. 2020;23(1):100783. Epub 2020/01/20. doi:  
818 10.1016/j.isci.2019.100783. PubMed PMID: 31954977; PubMed Central PMCID:  
819 PMC6970165.
- 820 56. Heukamp I, Kilian M, Gregor JI, Kiewert C, Schimke I, Kristiansen G, et al. Impact of  
821 polyunsaturated fatty acids on hepato-pancreatic prostaglandin and leukotriene concentration in  
822 ductal pancreatic cancer—Is there a correlation to tumour growth and liver metastasis?  
823 Prostaglandins, Leukotrienes and Essential Fatty Acids. 2006;74(4):223-33. doi:  
824 <https://doi.org/10.1016/j.plefa.2006.01.005>.
- 825 57. Roebuck BD. Dietary fat and the development of pancreatic cancer. Lipids.  
826 1992;27(10):804-6. Epub 1992/10/01. doi: 10.1007/BF02535854. PubMed PMID: 1435099.
- 827 58. Aronson NN, Jr., Kuranda MJ. Lysosomal degradation of Asn-linked glycoproteins.  
828 FASEB J. 1989;3(14):2615-22. Epub 1989/12/01. doi: 10.1096/fasebj.3.14.2531691. PubMed  
829 PMID: 2531691.
- 830 59. Ishiwata T, Cho K, Kawahara K, Yamamoto T, Fujiwara Y, Uchida E, et al. Role of  
831 lumican in cancer cells and adjacent stromal tissues in human pancreatic cancer. Oncol Rep.  
832 2007;18(3):537-43. Epub 2007/08/03. PubMed PMID: 17671699.
- 833 60. Caterson B, Melrose J. Keratan sulfate, a complex glycosaminoglycan with unique  
834 functional capability. Glycobiology. 2018;28(4):182-206. doi: 10.1093/glycob/cwy003.
- 835 61. Warburg O. On the origin of cancer cells. Science. 1956;123(3191):309-14. Epub  
836 1956/02/24. doi: 10.1126/science.123.3191.309. PubMed PMID: 13298683.
- 837 62. Feldmann G, Beaty R, Hruban RH, Maitra A. Molecular genetics of pancreatic  
838 intraepithelial neoplasia. J Hepatobiliary Pancreat Surg. 2007;14(3):224-32. Epub 2007/05/24.  
839 doi: 10.1007/s00534-006-1166-5. PubMed PMID: 17520196; PubMed Central PMCID:  
840 PMC6970165.



- 841 63. Gaglio D, Metallo CM, Gameiro PA, Hiller K, Danna LS, Balestrieri C, et al. Oncogenic  
842 K-Ras decouples glucose and glutamine metabolism to support cancer cell growth. *Mol Syst*  
843 *Biol.* 2011;7:523. Epub 2011/08/19. doi: 10.1038/msb.2011.56. PubMed PMID: 21847114;  
844 PubMed Central PMCID: PMCPMC3202795.
- 845 64. Chaika NV, Yu F, Purohit V, Mehla K, Lazenby AJ, DiMaio D, et al. Differential  
846 expression of metabolic genes in tumor and stromal components of primary and metastatic loci  
847 in pancreatic adenocarcinoma. *PloS one.* 2012;7(3):e32996. Epub 2012/03/14. doi:  
848 10.1371/journal.pone.0032996. PubMed PMID: 22412968; PubMed Central PMCID:  
849 PMCPMC3296773.
- 850 65. Vernucci E, Abrego J, Gunda V, Shukla SK, Dasgupta A, Rai V, et al. Metabolic  
851 Alterations in Pancreatic Cancer Progression. *Cancers (Basel).* 2019;12(1). Epub 2019/12/22.  
852 doi: 10.3390/cancers12010002. PubMed PMID: 31861288; PubMed Central PMCID:  
853 PMCPMC7016676.
- 854 66. Olou AA, King RJ, Yu F, Singh PK. MUC1 oncoprotein mitigates ER stress via CDA-  
855 mediated reprogramming of pyrimidine metabolism. *Oncogene.* 2020;39(16):3381-95. Epub  
856 2020/02/28. doi: 10.1038/s41388-020-1225-4. PubMed PMID: 32103170; PubMed Central  
857 PMCID: PMCPMC7165067.
- 858 67. Gunda V, Soucek J, Abrego J, Shukla SK, Goode GD, Vernucci E, et al. MUC1-  
859 Mediated Metabolic Alterations Regulate Response to Radiotherapy in Pancreatic Cancer. *Clin*  
860 *Cancer Res.* 2017;23(19):5881-91. Epub 2017/07/20. doi: 10.1158/1078-0432.CCR-17-1151.  
861 PubMed PMID: 28720669; PubMed Central PMCID: PMCPMC5626603.
- 862 68. Shukla SK, Purohit V, Mehla K, Gunda V, Chaika NV, Vernucci E, et al. MUC1 and  
863 HIF-1alpha Signaling Crosstalk Induces Anabolic Glucose Metabolism to Impart Gemcitabine  
864 Resistance to Pancreatic Cancer. *Cancer Cell.* 2017;32(1):71-87 e7. Epub 2017/07/12. doi:  
865 10.1016/j.ccell.2017.06.004. PubMed PMID: 28697344; PubMed Central PMCID:  
866 PMCPMC5533091.
- 867 69. Shukla SK, Gunda V, Abrego J, Haridas D, Mishra A, Soucek J, et al. MUC16-  
868 mediated activation of mTOR and c-Myc reprograms pancreatic cancer metabolism. *Oncotarget.*  
869 2015;6(22):19118-31. Epub 2015/06/06. doi: 10.18632/oncotarget.4078. PubMed PMID:  
870 26046375; PubMed Central PMCID: PMCPMC4662479.

- 871 70. Chaika NV, Gebregiworgis T, Lewallen ME, Purohit V, Radhakrishnan P, Liu X, et al.  
872 MUC1 mucin stabilizes and activates hypoxia-inducible factor 1 alpha to regulate metabolism in  
873 pancreatic cancer. *Proc Natl Acad Sci U S A*. 2012;109(34):13787-92. Epub 2012/08/08. doi:  
874 10.1073/pnas.1203339109. PubMed PMID: 22869720; PubMed Central PMCID:  
875 PMCPMC3427054.
- 876 71. Gebregiworgis T, Bhinderwala F, Purohit V, Chaika NV, Singh PK, Powers R. Insights  
877 into gemcitabine resistance and the potential for therapeutic monitoring. *Metabolomics*.  
878 2018;14(12):156. Epub 2019/03/05. doi: 10.1007/s11306-018-1452-7. PubMed PMID:  
879 30830412; PubMed Central PMCID: PMCPMC6620022.
- 880 72. Martin-Blazquez A, Jimenez-Luna C, Diaz C, Martinez-Galan J, Prados J, Vicente F, et  
881 al. Discovery of Pancreatic Adenocarcinoma Biomarkers by Untargeted Metabolomics. *Cancers*  
882 (Basel). 2020;12(4). Epub 2020/04/25. doi: 10.3390/cancers12041002. PubMed PMID:  
883 32325731; PubMed Central PMCID: PMCPMC7225994.
- 884 73. Feng HY, Chen YC. Role of bile acids in carcinogenesis of pancreatic cancer: An old  
885 topic with new perspective. *World J Gastroenterol*. 2016;22(33):7463-77. Epub 2016/09/28. doi:  
886 10.3748/wjg.v22.i33.7463. PubMed PMID: 27672269; PubMed Central PMCID:  
887 PMCPMC5011662.
- 888 74. Duez H, van der Veen JN, Duhem C, Pourcet B, Touvier T, Fontaine C, et al. Regulation  
889 of bile acid synthesis by the nuclear receptor Rev-erbalpha. *Gastroenterology*. 2008;135(2):689-  
890 98. Epub 2008/06/21. doi: 10.1053/j.gastro.2008.05.035. PubMed PMID: 18565334.
- 891 75. Mehla K, Singh PK. Metabolic Subtyping for Novel Personalized Therapies Against  
892 Pancreatic Cancer. *Clin Cancer Res*. 2020;26(1):6-8. Epub 2019/10/20. doi: 10.1158/1078-  
893 0432.CCR-19-2926. PubMed PMID: 31628144; PubMed Central PMCID: PMCPMC6942627.
- 894 76. Knab LM, Grippo PJ, Bentrem DJ. Involvement of eicosanoids in the pathogenesis of  
895 pancreatic cancer: the roles of cyclooxygenase-2 and 5-lipoxygenase. *World J Gastroenterol*.  
896 2014;20(31):10729-39. Epub 2014/08/26. doi: 10.3748/wjg.v20.i31.10729. PubMed PMID:  
897 25152576; PubMed Central PMCID: PMCPMC4138453.
- 898 77. Peters-Golden M, Henderson WR. Leukotrienes. *New England Journal of Medicine*.  
899 2007;357(18):1841-54. doi: 10.1056/NEJMra071371.
- 900 78. DelGiorno KE, Chung CY, Vavinskaya V, Maurer HC, Novak SW, Lytle NK, et al. Tuft  
901 Cells Inhibit Pancreatic Tumorigenesis in Mice by Producing Prostaglandin D2.

- 902 Gastroenterology. 2020;159(5):1866-81 e8. Epub 2020/07/28. doi: 10.1053/j.gastro.2020.07.037.  
903 PubMed PMID: 32717220; PubMed Central PMCID: PMCPMC7680354.
- 904 79. Jose C, Bellance N, Rossignol R. Choosing between glycolysis and oxidative  
905 phosphorylation: A tumor's dilemma? *Biochimica et Biophysica Acta (BBA) - Bioenergetics*.  
906 2011;1807(6):552-61. doi: <https://doi.org/10.1016/j.bbabbio.2010.10.012>.
- 907 80. Melone MAB, Valentino A, Margarucci S, Galderisi U, Giordano A, Peluso G. The  
908 carnitine system and cancer metabolic plasticity. *Cell Death Dis*. 2018;9(2):228. Epub  
909 2018/02/16. doi: 10.1038/s41419-018-0313-7. PubMed PMID: 29445084; PubMed Central  
910 PMCID: PMCPMC5833840.
- 911 81. Muoio DM. Metabolic inflexibility: when mitochondrial indecision leads to metabolic  
912 gridlock. *Cell*. 2014;159(6):1253-62. Epub 2014/12/07. doi: 10.1016/j.cell.2014.11.034. PubMed  
913 PMID: 25480291; PubMed Central PMCID: PMCPMC4765362.
- 914 82. Sharma S, Black SM. Carnitine Homeostasis, Mitochondrial Function, and  
915 Cardiovascular Disease. *Drug Discov Today Dis Mech*. 2009;6(1-4):e31-e9. Epub 2009/01/01.  
916 doi: 10.1016/j.ddmec.2009.02.001. PubMed PMID: 20648231; PubMed Central PMCID:  
917 PMCPMC2905823.
- 918 83. Longo N, Frigeni M, Pasquali M. Carnitine transport and fatty acid oxidation. *Biochimica*  
919 *et biophysica acta*. 2016;1863(10):2422-35. Epub 2016/02/02. doi:  
920 10.1016/j.bbamcr.2016.01.023. PubMed PMID: 26828774; PubMed Central PMCID:  
921 PMCPMC4967041.
- 922 84. Melone MAB, Valentino A, Margarucci S, Galderisi U, Giordano A, Peluso G. The  
923 carnitine system and cancer metabolic plasticity. *Cell Death & Disease*. 2018;9(2):228. doi:  
924 10.1038/s41419-018-0313-7.
- 925 85. Zha S, Ferdinandusse S, Hicks JL, Denis S, Dunn TA, Wanders RJ, et al. Peroxisomal  
926 branched chain fatty acid beta-oxidation pathway is upregulated in prostate cancer. *Prostate*.  
927 2005;63(4):316-23. Epub 2004/12/16. doi: 10.1002/pros.20177. PubMed PMID: 15599942.
- 928 86. Litwin JA, Beier K, Volkl A, Hofmann WJ, Fahimi HD. Immunocytochemical  
929 investigation of catalase and peroxisomal lipid beta-oxidation enzymes in human hepatocellular  
930 tumors and liver cirrhosis. *Virchows Arch*. 1999;435(5):486-95. Epub 1999/12/11. doi:  
931 10.1007/s004280050432. PubMed PMID: 10592052.

- 932 87. Lauer C, Volkl A, Riedl S, Fahimi HD, Beier K. Impairment of peroxisomal biogenesis  
933 in human colon carcinoma. *Carcinogenesis*. 1999;20(6):985-9. Epub 1999/06/05. doi:  
934 10.1093/carcin/20.6.985. PubMed PMID: 10357777.
- 935 88. Keller JM, Cable S, el Bouhtoury F, Heusser S, Scotto C, Armbruster L, et al.  
936 Peroxisome through cell differentiation and neoplasia. *Biol Cell*. 1993;77(1):77-88. Epub  
937 1993/01/01. doi: 10.1016/s0248-4900(05)80177-7. PubMed PMID: 8518747.
- 938 89. and JKR, Hashimoto T. PEROXISOMAL  $\beta$ -OXIDATION AND PEROXISOME  
939 PROLIFERATOR–ACTIVATED RECEPTOR  $\alpha$ : An Adaptive Metabolic System. *Annual*  
940 *Review of Nutrition*. 2001;21(1):193-230. doi: 10.1146/annurev.nutr.21.1.193. PubMed PMID:  
941 11375435.
- 942 90. Demarquoy J, Le Borgne F. Crosstalk between mitochondria and peroxisomes. *World J*  
943 *Biol Chem*. 2015;6(4):301-9. Epub 2015/12/03. doi: 10.4331/wjbc.v6.i4.301. PubMed PMID:  
944 26629313; PubMed Central PMCID: PMC4657118.
- 945 91. Swierczynski J, Hebanowska A, Sledzinski T. Role of abnormal lipid metabolism in  
946 development, progression, diagnosis and therapy of pancreatic cancer. *World J Gastroenterol*.  
947 2014;20(9):2279-303. Epub 2014/03/08. doi: 10.3748/wjg.v20.i9.2279. PubMed PMID:  
948 24605027; PubMed Central PMCID: PMC3942833.
- 949 92. Menendez JA, Lupu R. Fatty acid synthase and the lipogenic phenotype in cancer  
950 pathogenesis. *Nature reviews Cancer*. 2007;7(10):763-77. Epub 2007/09/21. doi:  
951 10.1038/nrc2222. PubMed PMID: 17882277.
- 952 93. Tadros S, Shukla SK, King RJ, Gunda V, Vernucci E, Abrego J, et al. De Novo Lipid  
953 Synthesis Facilitates Gemcitabine Resistance through Endoplasmic Reticulum Stress in  
954 Pancreatic Cancer. *Cancer Res*. 2017;77(20):5503-17. Epub 2017/08/16. doi: 10.1158/0008-  
955 5472.CAN-16-3062. PubMed PMID: 28811332; PubMed Central PMCID: PMC4657118.
- 956 94. Baenke F, Peck B, Miess H, Schulze A. Hooked on fat: the role of lipid synthesis in  
957 cancer metabolism and tumour development. *Disease models & mechanisms*. 2013;6(6):1353-  
958 63. Epub 2013/11/10. doi: 10.1242/dmm.011338. PubMed PMID: 24203995; PubMed Central  
959 PMCID: PMC3820259.
- 960 95. Guillaumond F, Bidaut G, Ouaisi M, Servais S, Gouirand V, Olivares O, et al.  
961 Cholesterol uptake disruption, in association with chemotherapy, is a promising combined  
962 metabolic therapy for pancreatic adenocarcinoma. *Proc Natl Acad Sci U S A*. 2015;112(8):2473-

- 963 8. Epub 2015/02/13. doi: 10.1073/pnas.1421601112. PubMed PMID: 25675507; PubMed  
964 Central PMCID: PMC4345573.
- 965 96. Rong Y, Wu W, Ni X, Kuang T, Jin D, Wang D, et al. Lactate dehydrogenase A is  
966 overexpressed in pancreatic cancer and promotes the growth of pancreatic cancer cells. *Tumour*  
967 *Biol.* 2013;34(3):1523-30. Epub 2013/02/14. doi: 10.1007/s13277-013-0679-1. PubMed PMID:  
968 23404405.
- 969 97. Mohammad GH, Olde Damink SW, Malago M, Dhar DK, Pereira SP. Pyruvate Kinase  
970 M2 and Lactate Dehydrogenase A Are Overexpressed in Pancreatic Cancer and Correlate with  
971 Poor Outcome. *PloS one.* 2016;11(3):e0151635. Epub 2016/03/19. doi:  
972 10.1371/journal.pone.0151635. PubMed PMID: 26989901; PubMed Central PMCID:  
973 PMC4798246.
- 974 98. Wishart DS, Feunang YD, Guo AC, Lo EJ, Marcu A, Grant JR, et al. DrugBank 5.0: a  
975 major update to the DrugBank database for 2018. *Nucleic acids research.* 2018;46(D1):D1074-  
976 D82. Epub 2017/11/11. doi: 10.1093/nar/gkx1037. PubMed PMID: 29126136; PubMed Central  
977 PMCID: PMC5753335.
- 978 99. Funk C, Ponelle C, Scheuermann G, Pantze M. Cholestatic potential of troglitazone as a  
979 possible factor contributing to troglitazone-induced hepatotoxicity: in vivo and in vitro  
980 interaction at the canalicular bile salt export pump (Bsep) in the rat. *Mol Pharmacol.*  
981 2001;59(3):627-35. Epub 2001/02/17. PubMed PMID: 11179459.
- 982 100. Gale EA. Troglitazone: the lesson that nobody learned? *Diabetologia.* 2006;49(1):1-6.  
983 Epub 2005/12/20. doi: 10.1007/s00125-005-0074-6. PubMed PMID: 16362281.
- 984 101. Salamone S, Colin C, Grillier-Vuissoz I, Kuntz S, Mazerbourg S, Flament S, et al.  
985 Synthesis of new troglitazone derivatives: anti-proliferative activity in breast cancer cell lines  
986 and preliminary toxicological study. *European journal of medicinal chemistry.* 2012;51:206-15.  
987 Epub 2012/03/14. doi: 10.1016/j.ejmech.2012.02.044. PubMed PMID: 22409968.
- 988 102. Mazerbourg S, Kuntz S, Grillier-Vuissoz I, Berthe A, Geoffroy M, Flament S, et al.  
989 Reprofiling of Troglitazone Towards More Active and Less Toxic Derivatives: A New Hope for  
990 Cancer Treatment? *Curr Top Med Chem.* 2016;16(19):2115-24. Epub 2016/02/18. doi:  
991 10.2174/1568026616666160216153036. PubMed PMID: 26881718.
- 992 103. Bordessa A, Colin-Cassin C, Grillier-Vuissoz I, Kuntz S, Mazerbourg S, Husson G, et al.  
993 Optimization of troglitazone derivatives as potent anti-proliferative agents: towards more active

- 994 and less toxic compounds. *European journal of medicinal chemistry*. 2014;83:129-40. Epub  
995 2014/06/24. doi: 10.1016/j.ejmech.2014.06.015. PubMed PMID: 24953030.
- 996 104. Colin C, Salamone S, Grillier-Vuissoz I, Boisbrun M, Kuntz S, Lecomte J, et al. New  
997 troglitazone derivatives devoid of PPARgamma agonist activity display an increased  
998 antiproliferative effect in both hormone-dependent and hormone-independent breast cancer cell  
999 lines. *Breast Cancer Res Treat*. 2010;124(1):101-10. Epub 2010/01/08. doi: 10.1007/s10549-009-  
1000 0700-y. PubMed PMID: 20054646.
- 1001 105. Saha S, Chan DS, Lee CY, Wong W, New LS, Chui WK, et al. Pyrrolidinediones reduce  
1002 the toxicity of thiazolidinediones and modify their anti-diabetic and anti-cancer properties.  
1003 *European journal of pharmacology*. 2012;697(1-3):13-23. Epub 2012/10/09. doi:  
1004 10.1016/j.ejphar.2012.09.021. PubMed PMID: 23041271.
- 1005 106. Kapoor K, Finer-Moore JS, Pedersen BP, Caboni L, Waight A, Hillig RC, et al.  
1006 Mechanism of inhibition of human glucose transporter GLUT1 is conserved between  
1007 cytochalasin B and phenylalanine amides. *Proc Natl Acad Sci U S A*. 2016;113(17):4711-6.  
1008 Epub 2016/04/15. doi: 10.1073/pnas.1603735113. PubMed PMID: 27078104; PubMed Central  
1009 PMCID: PMC4855560.
- 1010 107. Klepper J, Wang D, Fischbarg J, Vera JC, Jarjour IT, O'Driscoll KR, et al. Defective  
1011 glucose transport across brain tissue barriers: a newly recognized neurological syndrome.  
1012 *Neurochem Res*. 1999;24(4):587-94. Epub 1999/05/05. doi: 10.1023/a:1022544131826. PubMed  
1013 PMID: 10227690.
- 1014 108. Lee EE, Ma J, Sacharidou A, Mi W, Salato VK, Nguyen N, et al. A Protein Kinase C  
1015 Phosphorylation Motif in GLUT1 Affects Glucose Transport and is Mutated in GLUT1  
1016 Deficiency Syndrome. *Molecular cell*. 2015;58(5):845-53. Epub 2015/05/20. doi:  
1017 10.1016/j.molcel.2015.04.015. PubMed PMID: 25982116; PubMed Central PMCID:  
1018 PMC4458224.
- 1019 109. Mueckler M, Makepeace C. Transmembrane segment 6 of the Glut1 glucose transporter  
1020 is an outer helix and contains amino acid side chains essential for transport activity. *J Biol Chem*.  
1021 2008;283(17):11550-5. Epub 2008/02/05. doi: 10.1074/jbc.M708896200. PubMed PMID:  
1022 18245775; PubMed Central PMCID: PMC2431073.
- 1023 110. Mueckler M, Makepeace C. Model of the exofacial substrate-binding site and helical  
1024 folding of the human Glut1 glucose transporter based on scanning mutagenesis. *Biochemistry*.



- 1025 2009;48(25):5934-42. Epub 2009/05/20. doi: 10.1021/bi900521n. PubMed PMID: 19449892;  
1026 PubMed Central PMCID: PMCPMC2776625.
- 1027 111. Koch A, Lang SA, Wild PJ, Gantner S, Mahli A, Spanier G, et al. Glucose transporter  
1028 isoform 1 expression enhances metastasis of malignant melanoma cells. *Oncotarget*.  
1029 2015;6(32):32748-60. Epub 2015/08/22. doi: 10.18632/oncotarget.4977. PubMed PMID:  
1030 26293674; PubMed Central PMCID: PMCPMC4741727.
- 1031 112. Nagarajan A, Dogra SK, Sun L, Gandotra N, Ho T, Cai G, et al. Paraoxonase 2  
1032 Facilitates Pancreatic Cancer Growth and Metastasis by Stimulating GLUT1-Mediated Glucose  
1033 Transport. *Molecular cell*. 2017;67(4):685-701 e6. Epub 2017/08/15. doi:  
1034 10.1016/j.molcel.2017.07.014. PubMed PMID: 28803777; PubMed Central PMCID:  
1035 PMCPMC5567863.
- 1036 113. Vijay N, Morris ME. Role of monocarboxylate transporters in drug delivery to the brain.  
1037 *Current pharmaceutical design*. 2014;20(10):1487-98. Epub 2013/06/25. doi:  
1038 10.2174/13816128113199990462. PubMed PMID: 23789956; PubMed Central PMCID:  
1039 PMCPMC4084603.
- 1040 114. Field MS, Kamynina E, Watkins D, Rosenblatt DS, Stover PJ. Human mutations in  
1041 methylenetetrahydrofolate dehydrogenase 1 impair nuclear de novo thymidylate biosynthesis.  
1042 *Proceedings of the National Academy of Sciences*. 2015;112(2):400-5. doi:  
1043 10.1073/pnas.1414555112.
- 1044 115. Cheng CC, Wooten J, Gibbs ZA, McGlynn K, Mishra P, Whitehurst AW. Sperm-specific  
1045 COX6B2 enhances oxidative phosphorylation, proliferation, and survival in human lung  
1046 adenocarcinoma. *Elife*. 2020;9. Epub 2020/09/30. doi: 10.7554/eLife.58108. PubMed PMID:  
1047 32990599; PubMed Central PMCID: PMCPMC7556868.
- 1048 116. Anders S, Huber W. Differential expression analysis for sequence count data. *Genome*  
1049 *Biol*. 2010;11(10):R106. Epub 2010/10/29. doi: 10.1186/gb-2010-11-10-r106. PubMed PMID:  
1050 20979621; PubMed Central PMCID: PMCPMC3218662.
- 1051 117. Rodriguez-Esteban R, Jiang X. Differential gene expression in disease: a comparison  
1052 between high-throughput studies and the literature. *BMC Med Genomics*. 2017;10(1):59. Epub  
1053 2017/10/13. doi: 10.1186/s12920-017-0293-y. PubMed PMID: 29020950; PubMed Central  
1054 PMCID: PMCPMC5637346.

- 1055 118. Liu Z-P, Wu C, Miao H, Wu H. RegNetwork: an integrated database of transcriptional  
1056 and post-transcriptional regulatory networks in human and mouse. Database. 2015;2015. doi:  
1057 10.1093/database/bav095.
- 1058 119. Shannon P, Markiel A, Ozier O, Baliga NS, Wang JT, Ramage D, et al. Cytoscape: a  
1059 software environment for integrated models of biomolecular interaction networks. Genome Res.  
1060 2003;13(11):2498-504. Epub 2003/11/05. doi: 10.1101/gr.1239303. PubMed PMID: 14597658;  
1061 PubMed Central PMCID: PMC403769.
- 1062 120. Orth JD, Thiele I, Palsson BO. What is flux balance analysis? Nat Biotech.  
1063 2010;28(3):245-8. doi:  
1064 <http://www.nature.com/nbt/journal/v28/n3/abs/nbt.1614.html#supplementary-information>.
- 1065 121. Thiele I, Palsson BO. A protocol for generating a high-quality genome-scale metabolic  
1066 reconstruction. Nat Protoc. 2010;5(1):93-121. doi: 10.1038/nprot.2009.203. PubMed PMID:  
1067 20057383; PubMed Central PMCID: PMC3125167.
- 1068 122. Benjamini Y, Hochberg Y. Controlling the False Discovery Rate: A Practical and  
1069 Powerful Approach to Multiple Testing. Journal of the Royal Statistical Society Series B  
1070 (Methodological). 1995;57(1):289-300.
- 1071 123. Bussieck MR, Meeraus A. General algebraic modeling system (GAMS). Appl Optimizat.  
1072 2004;88:137-57. PubMed PMID: WOS:000189495200008.
- 1073 124. Becker SA. Quantitative prediction of cellular metabolism with constraint-based models:  
1074 The COBRA Toolbox. Nat Protoc. 2007;2:727-38.
- 1075 125. Schellenberger J, Que R, Fleming R, Thiele I, Orth J, Feist A, et al. Quantitative  
1076 prediction of cellular metabolism with constraint-based models: the COBRA Toolbox v2.0. Nat  
1077 Protoc. 2011;6. doi: 10.1038/nprot.2011.308.
- 1078



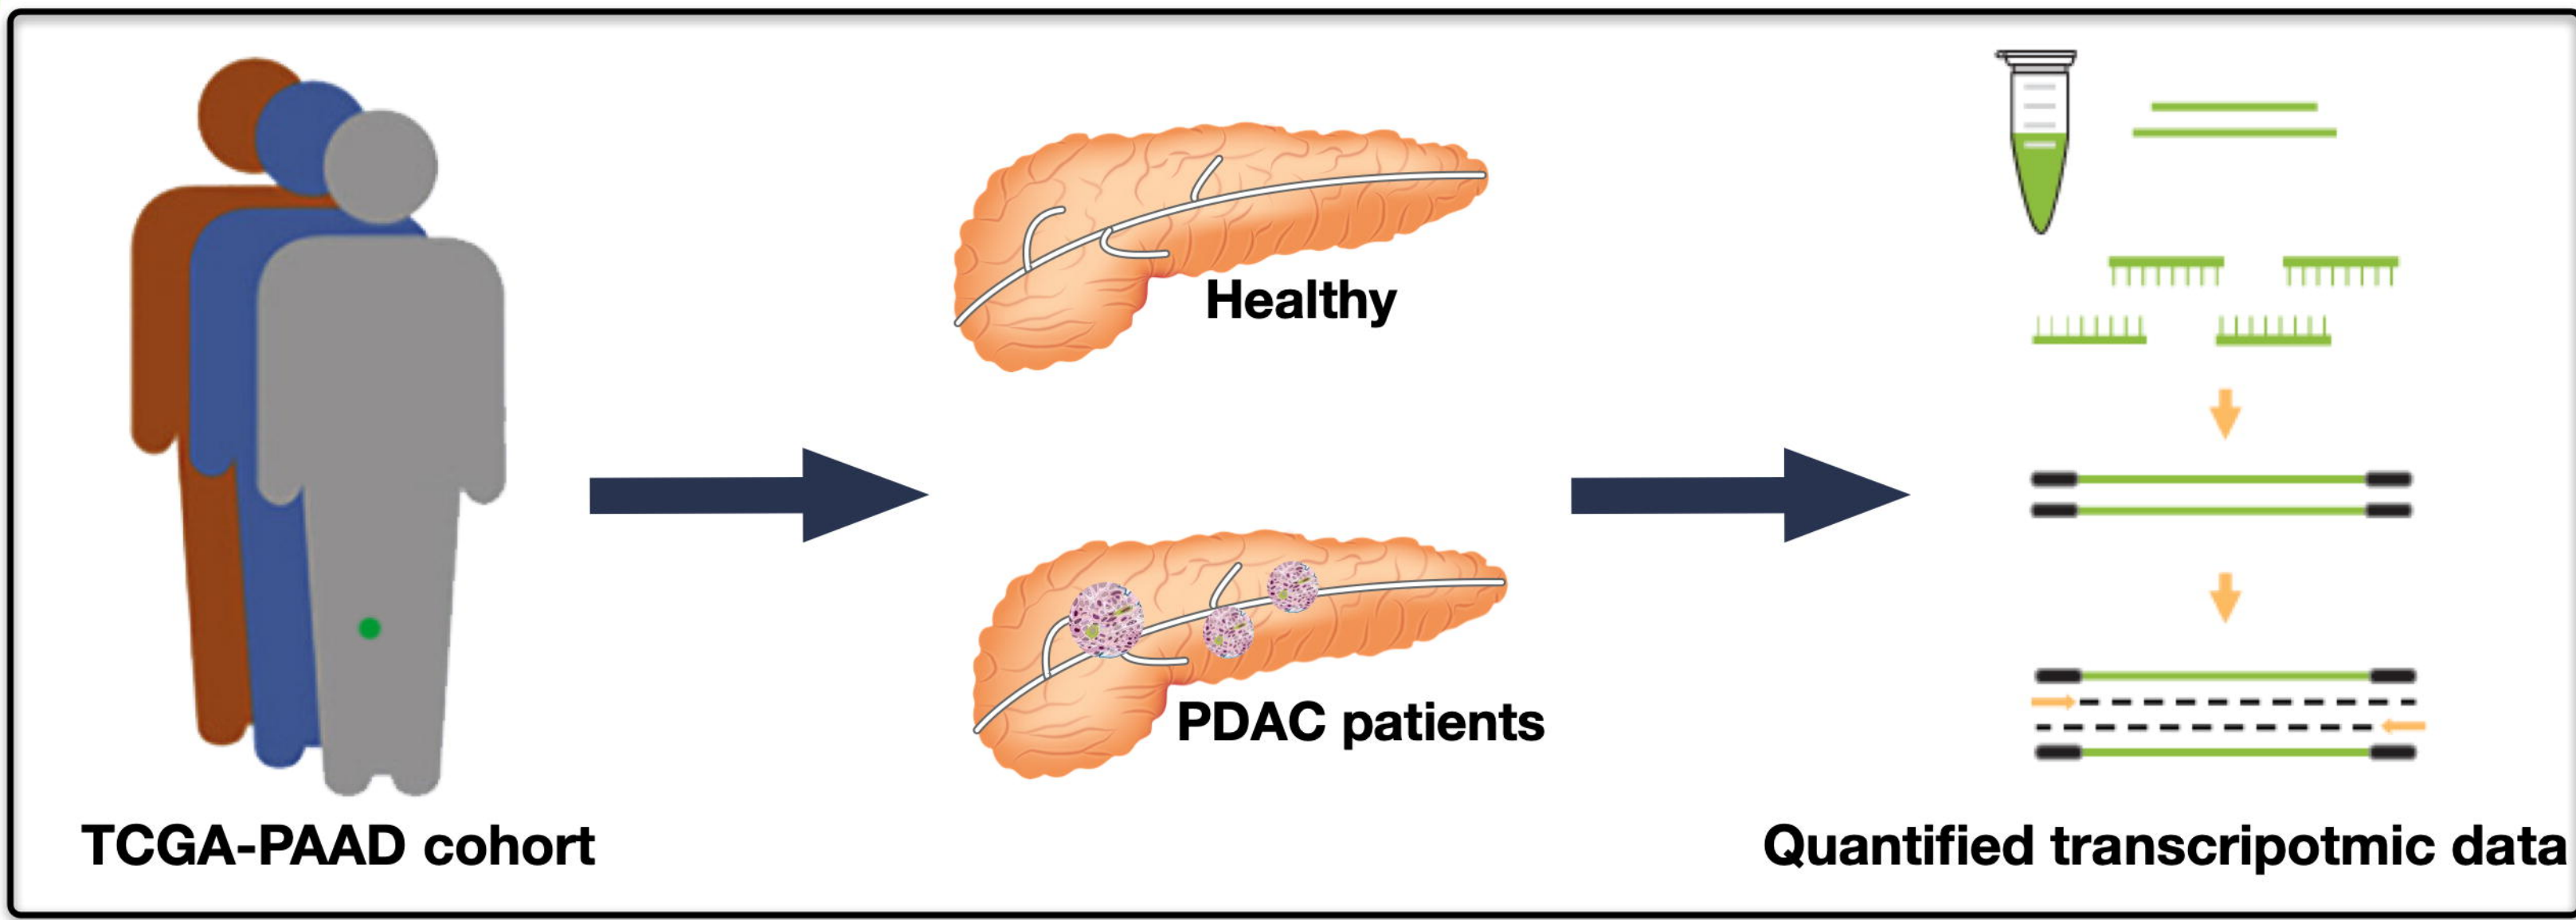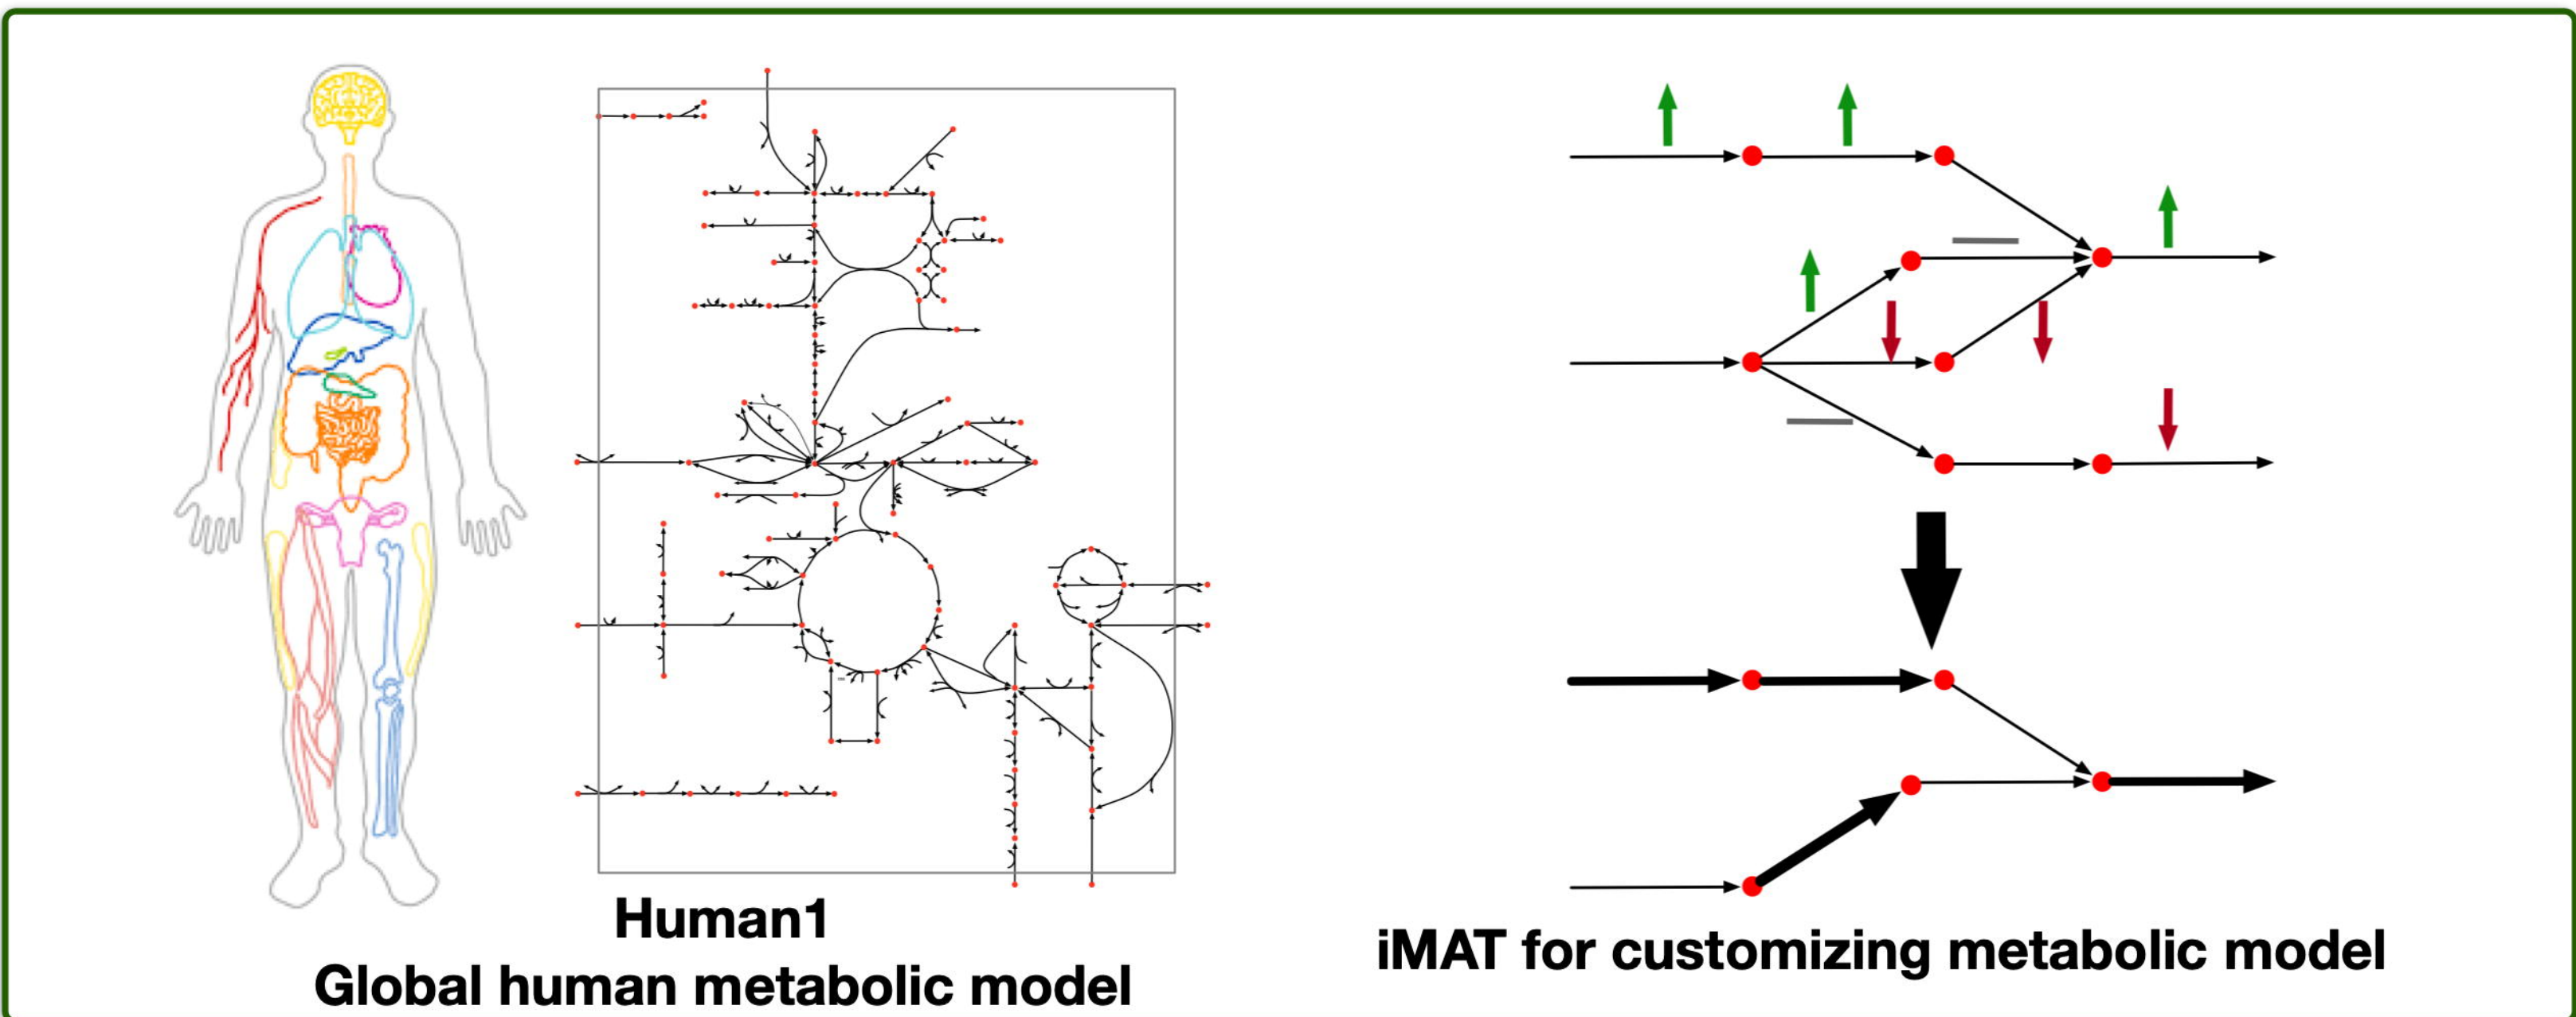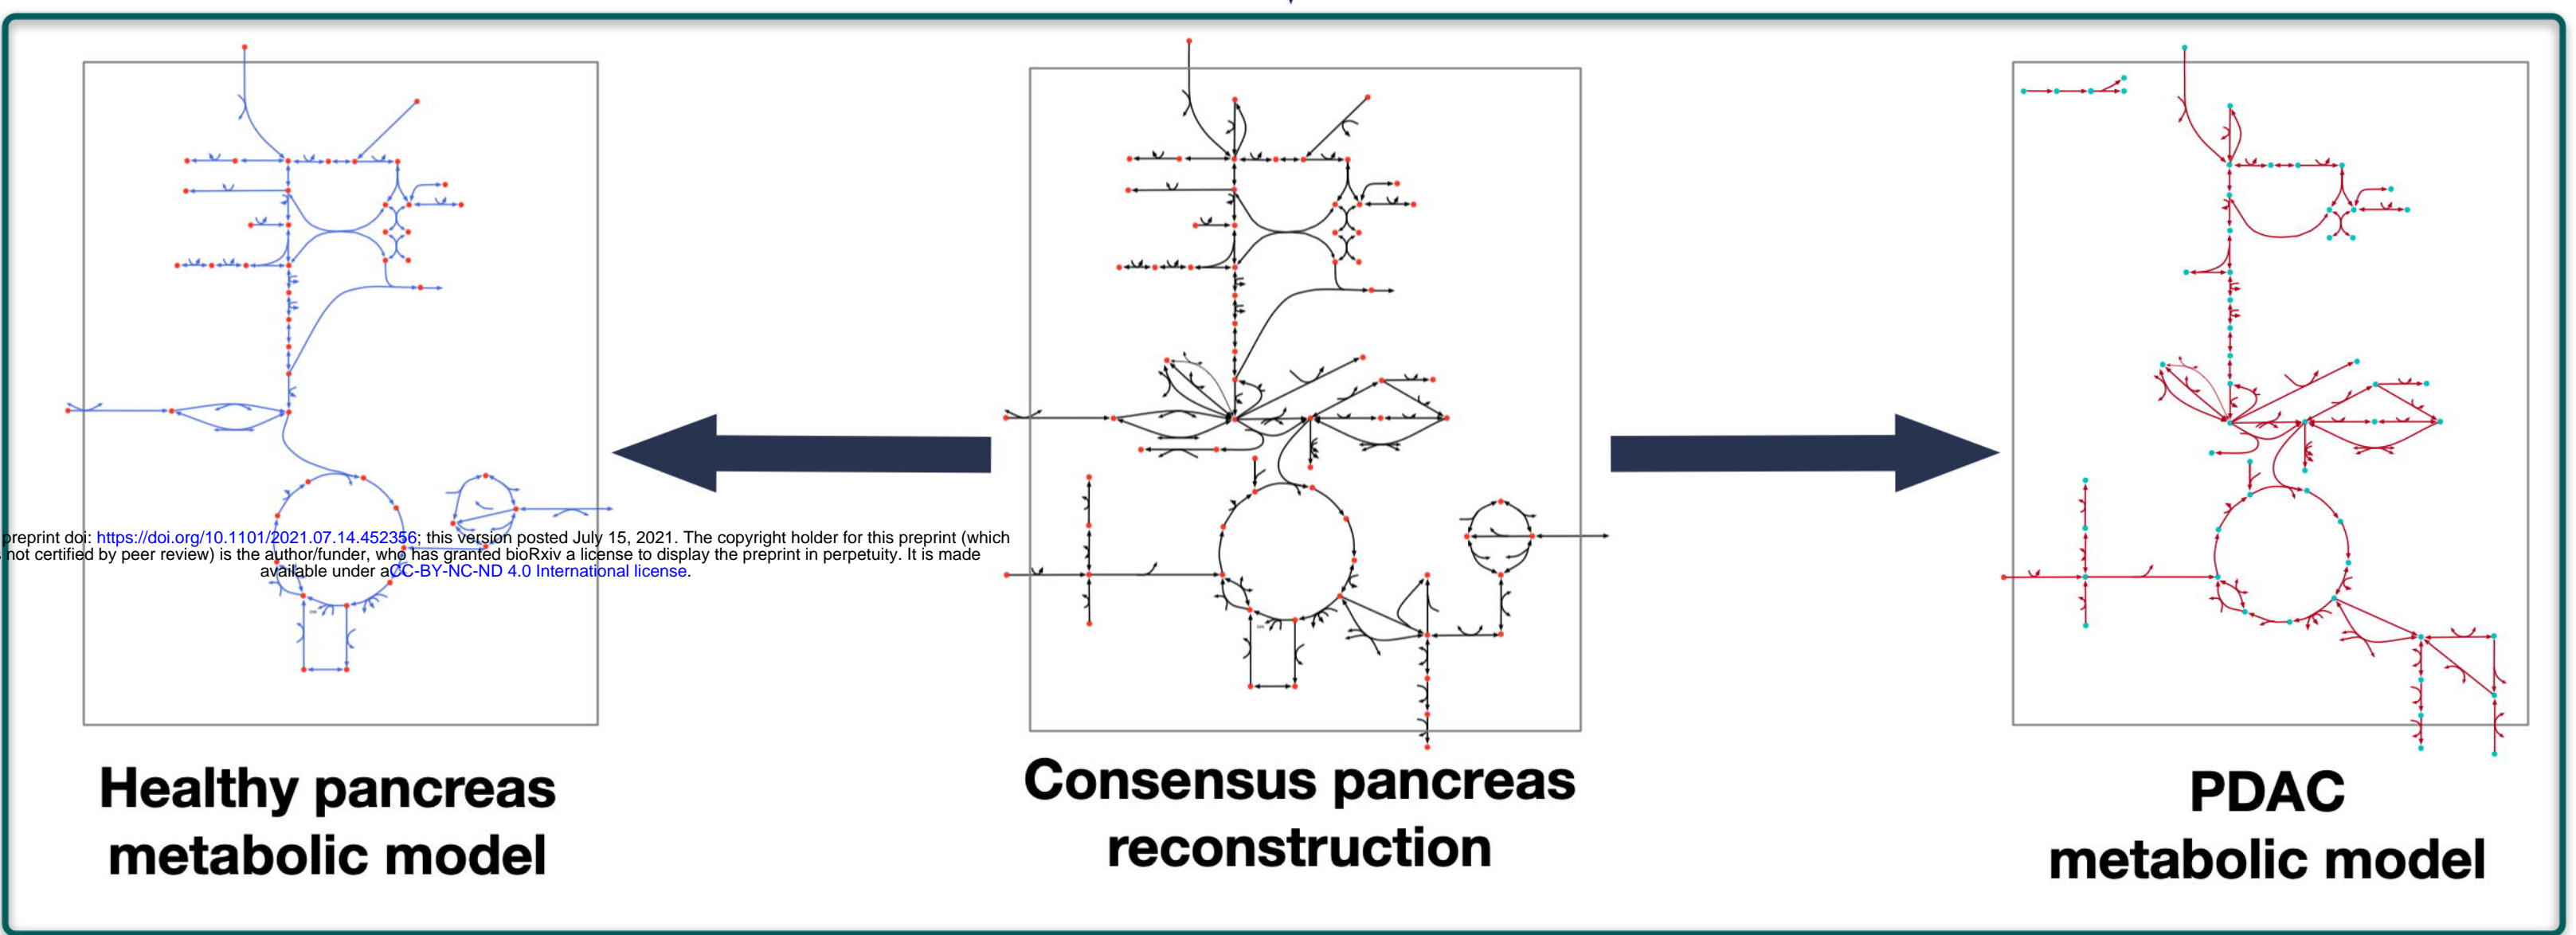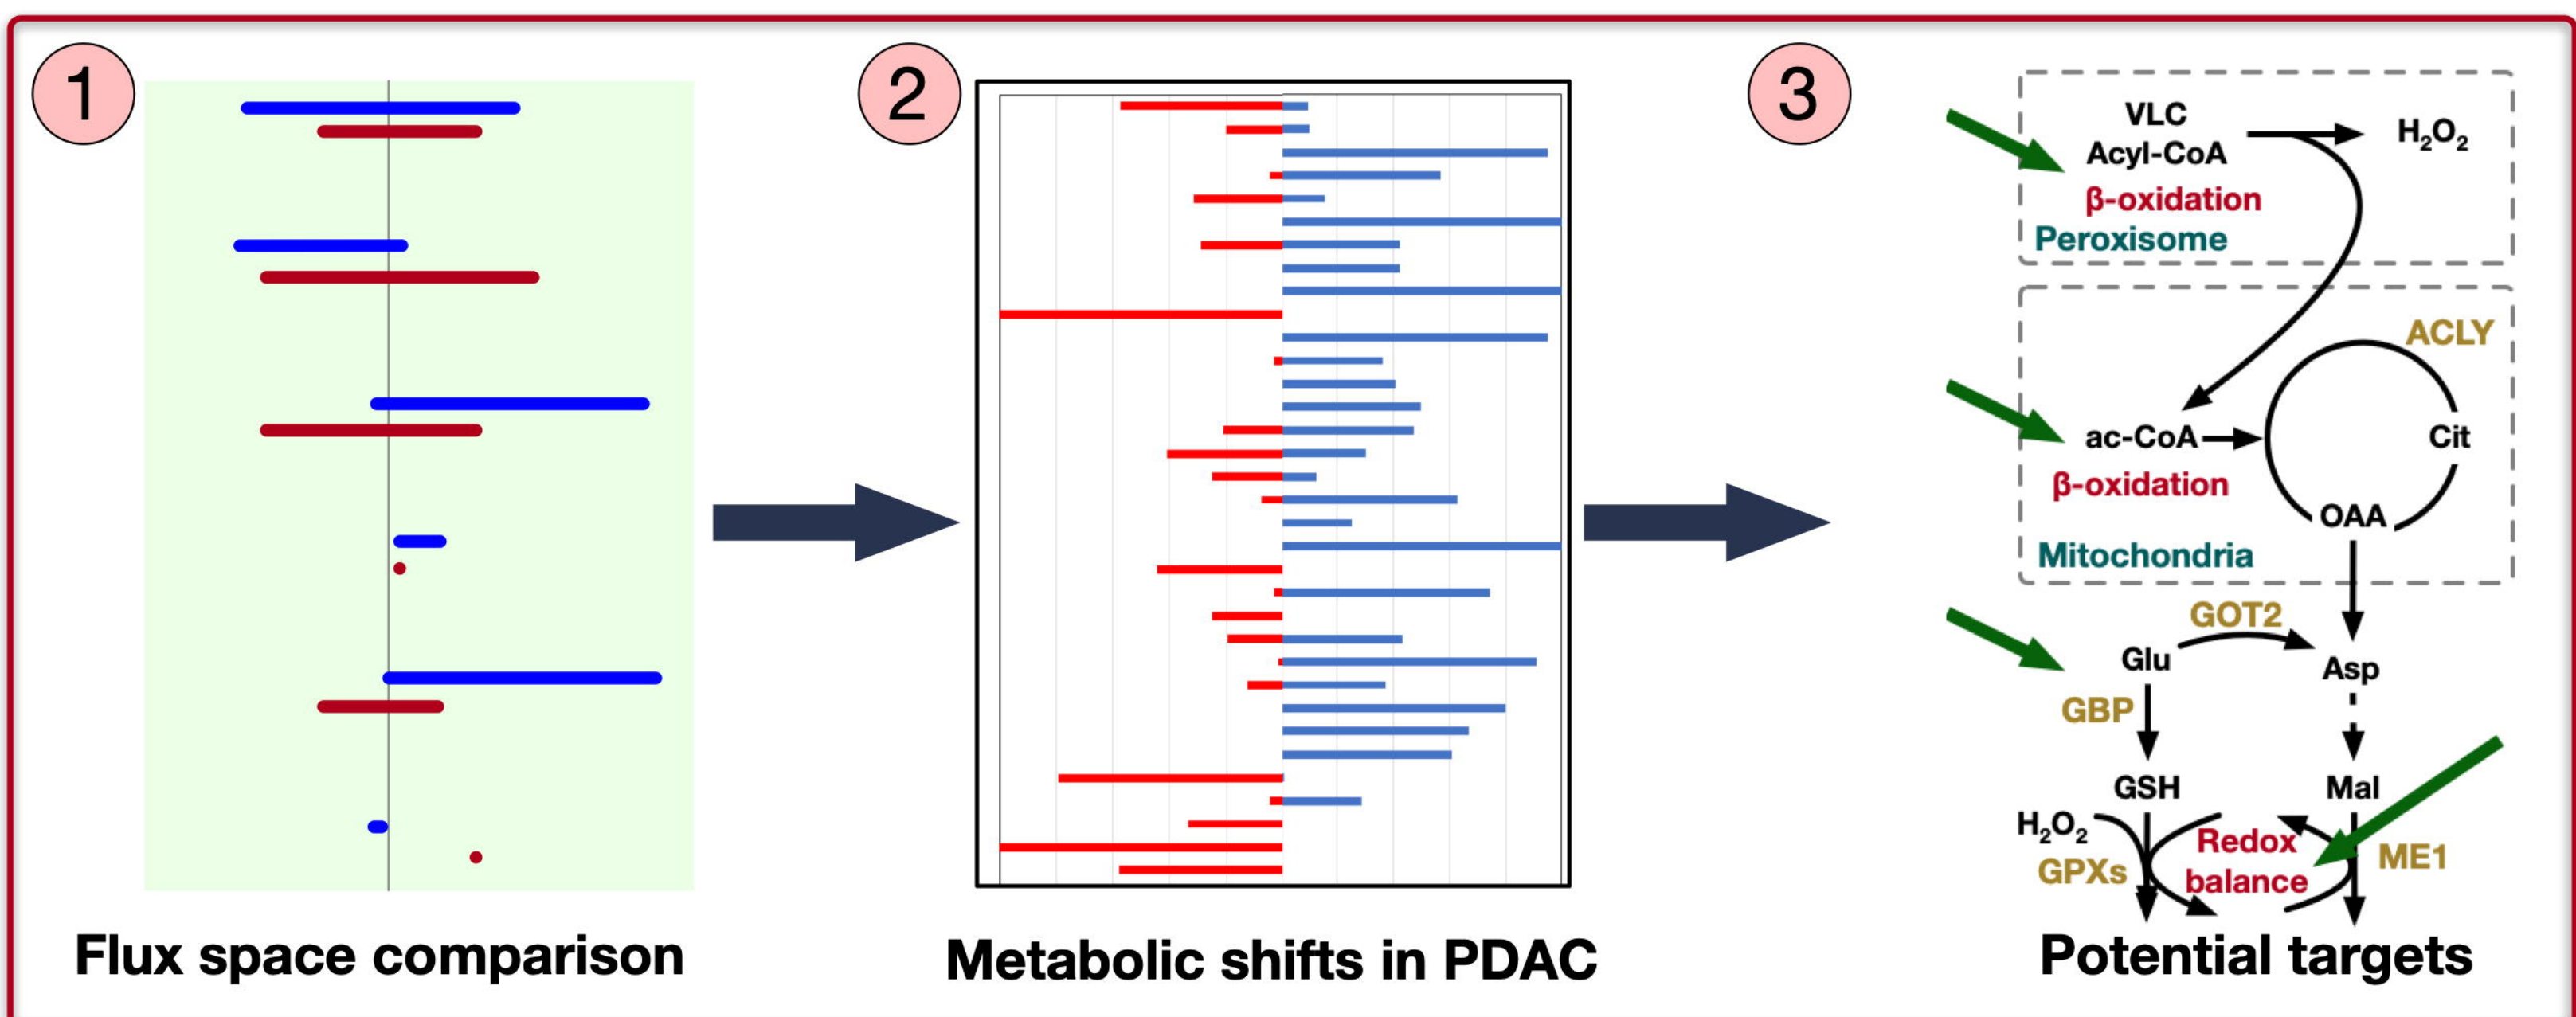



**A**

|                    | Healthy | PDAC |
|--------------------|---------|------|
| <b>Genes</b>       | 3286    | 3286 |
| <b>Reactions</b>   | 6384    | 5872 |
| <b>Metabolites</b> | 4703    | 4381 |

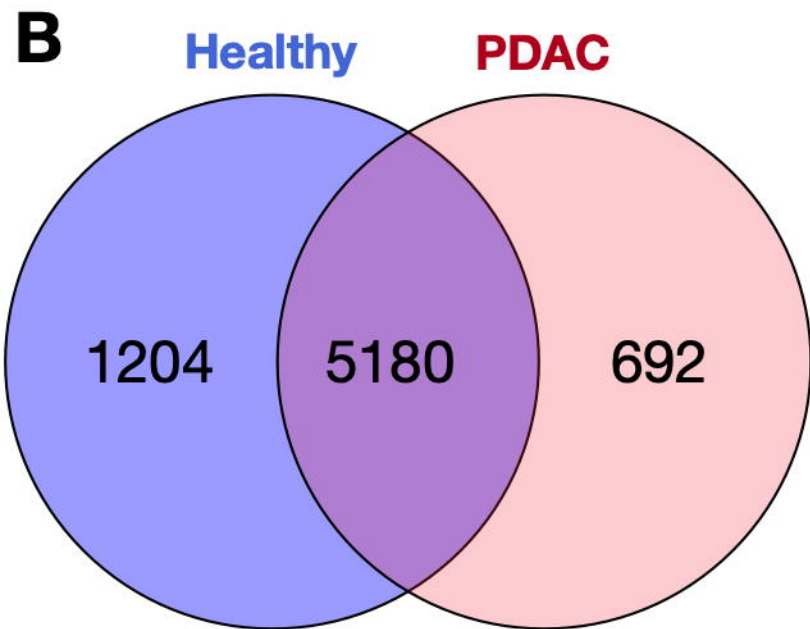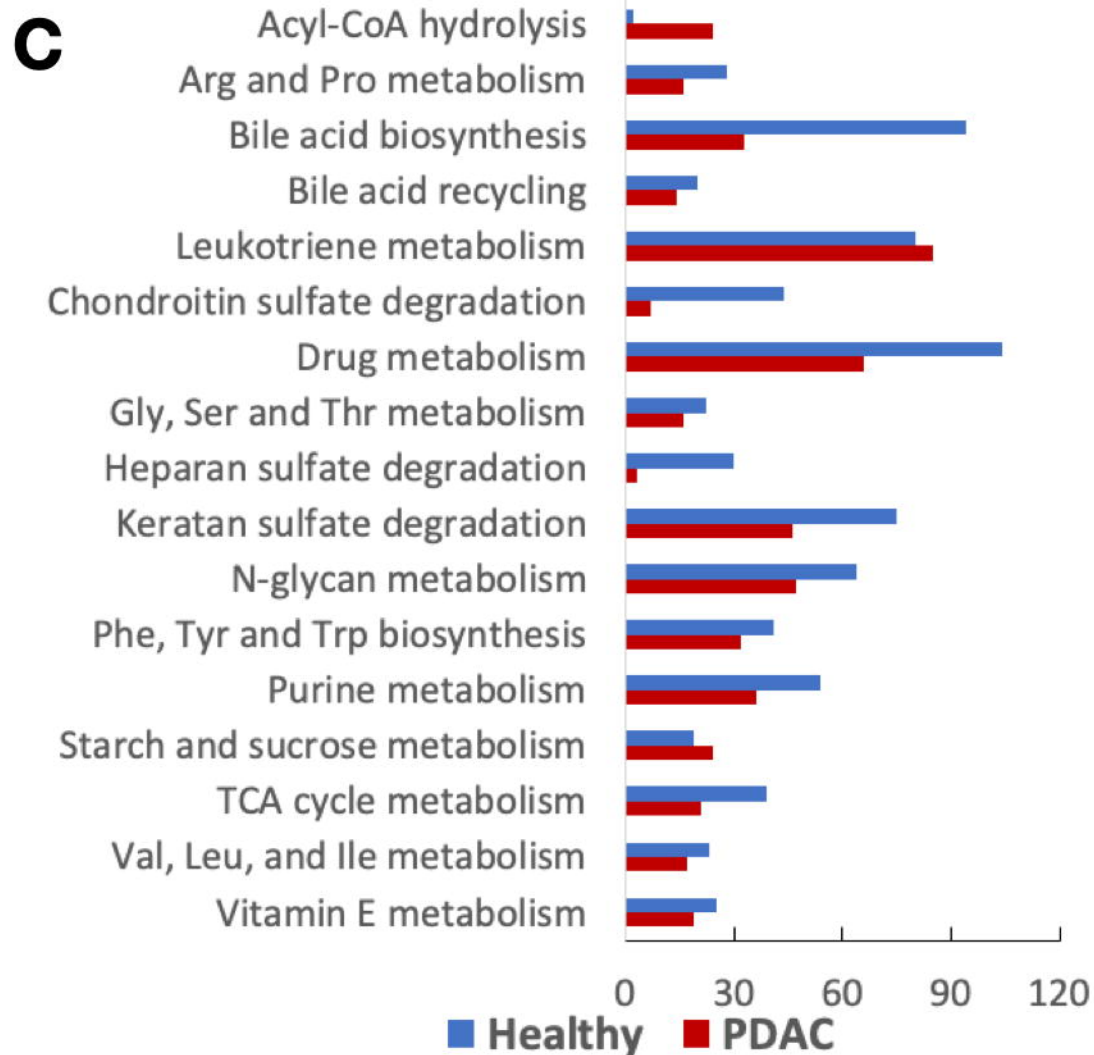

Percentage of rxns in a pathway **shrunk** or **expanded**

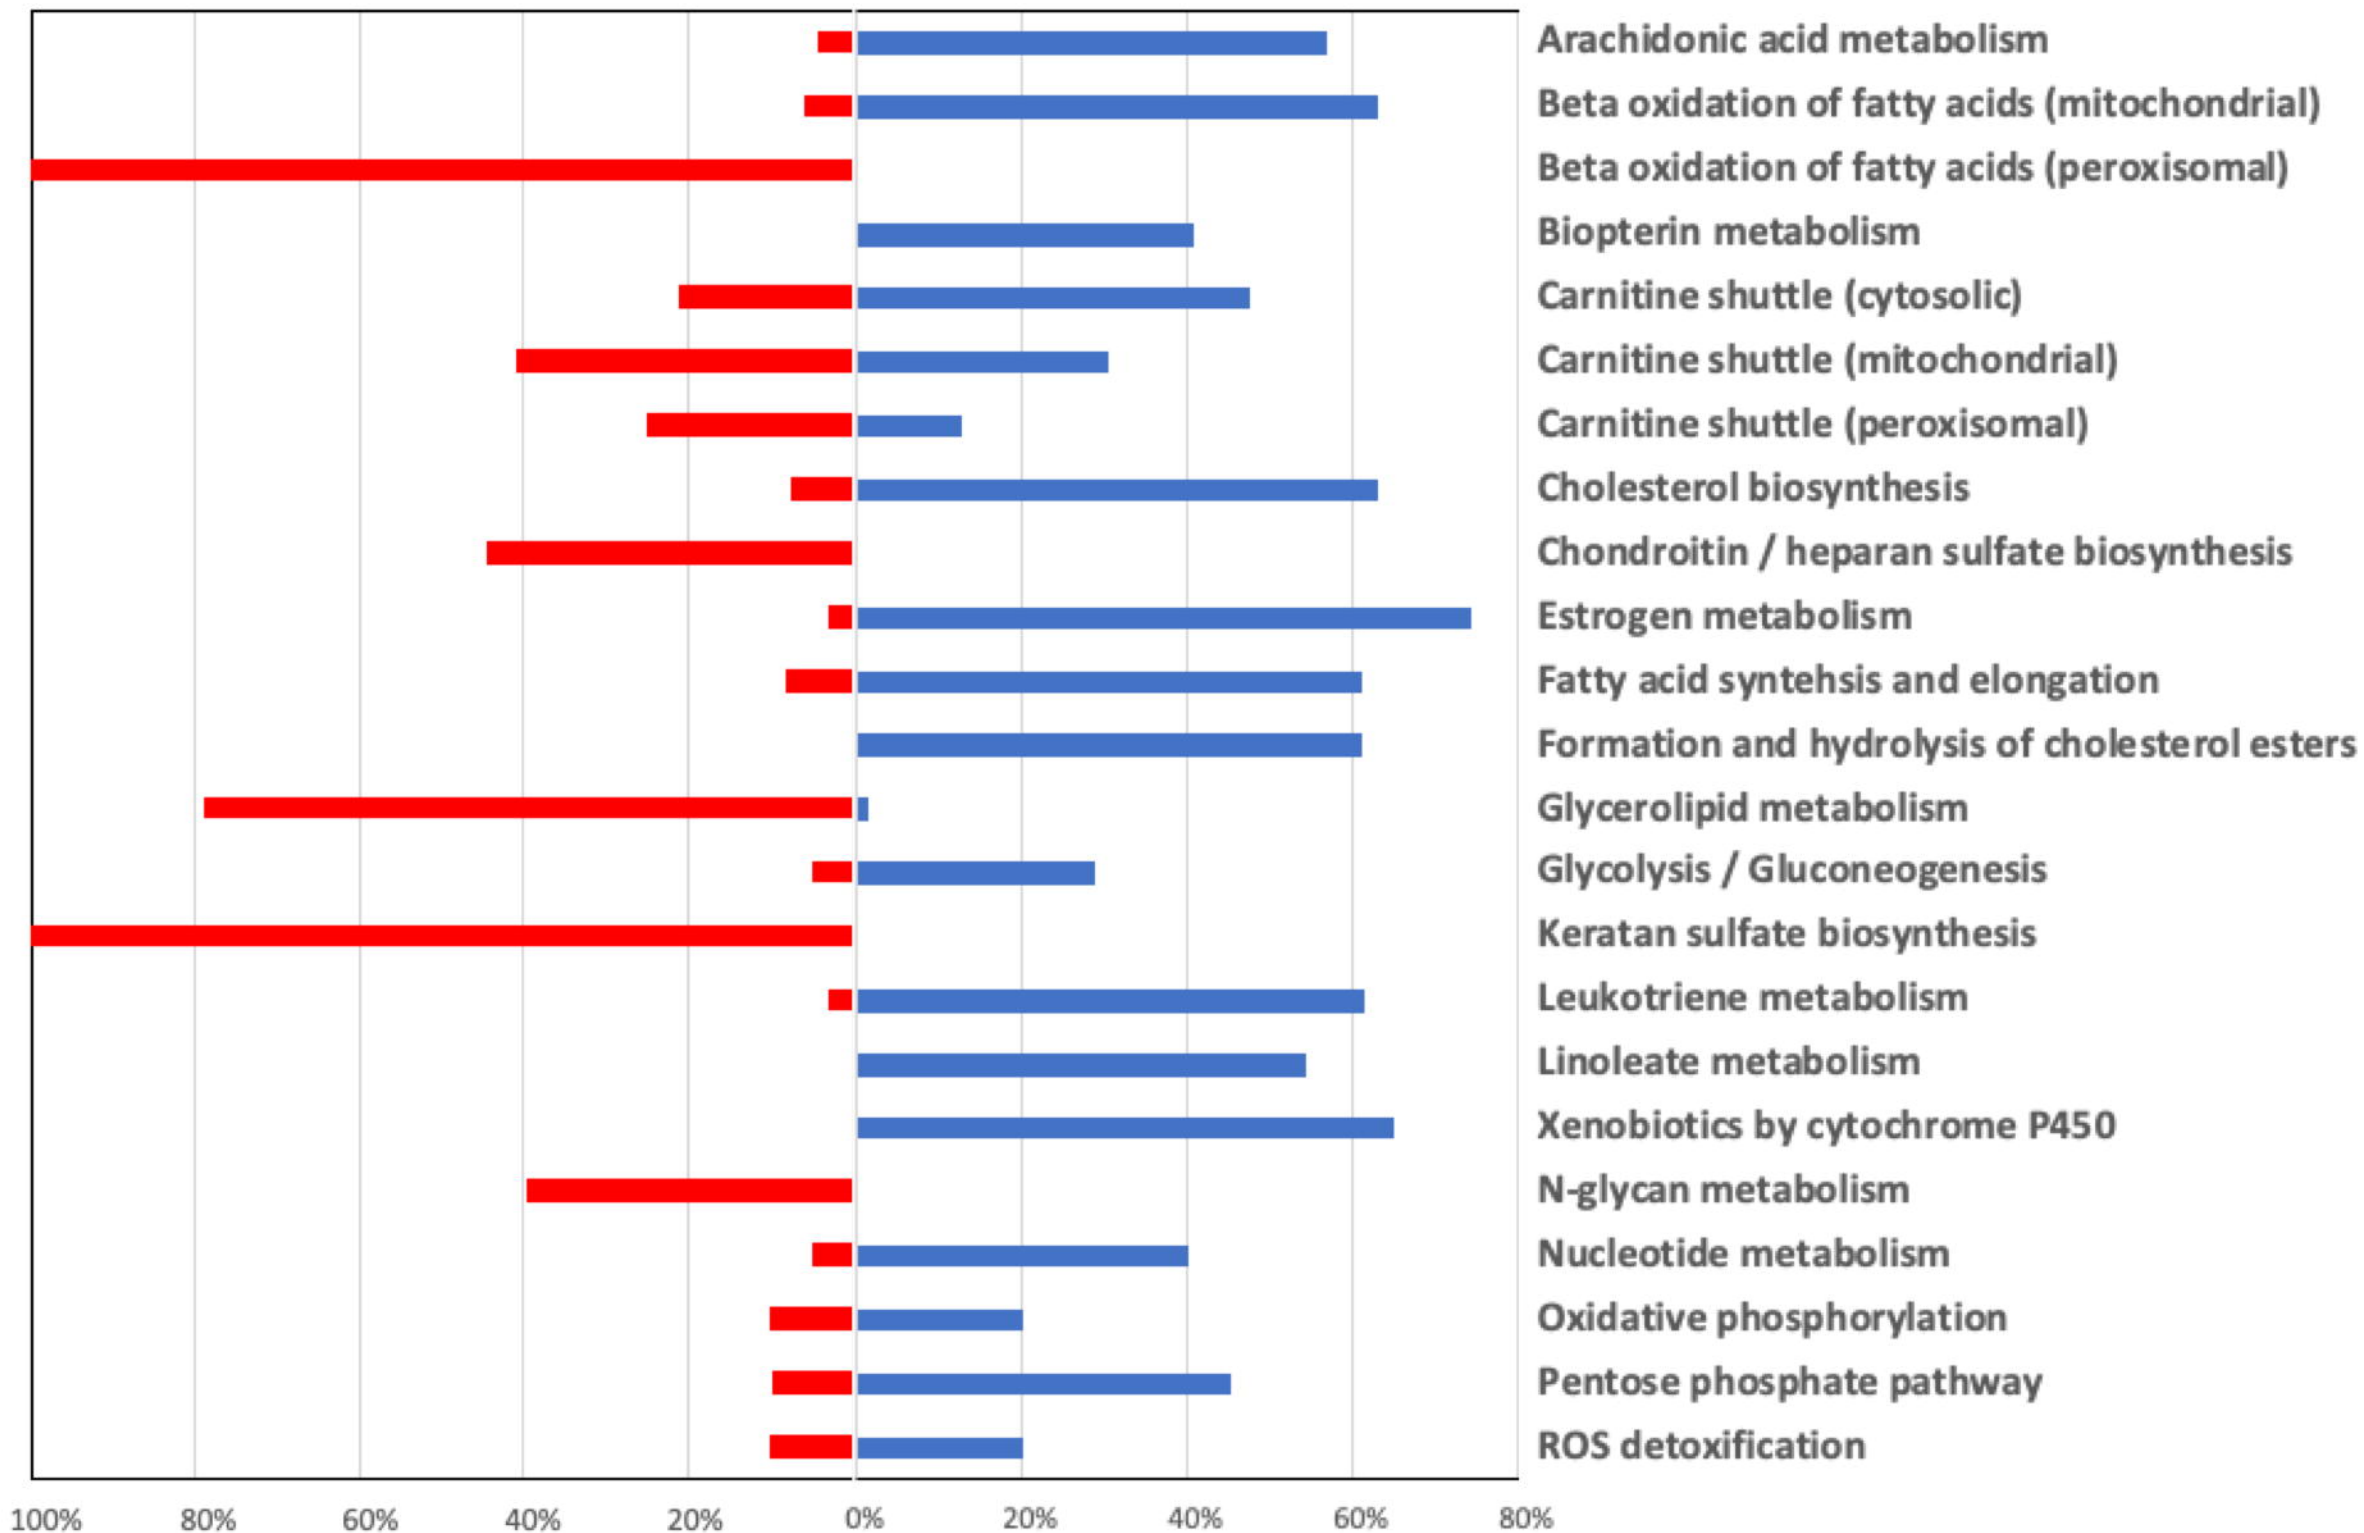

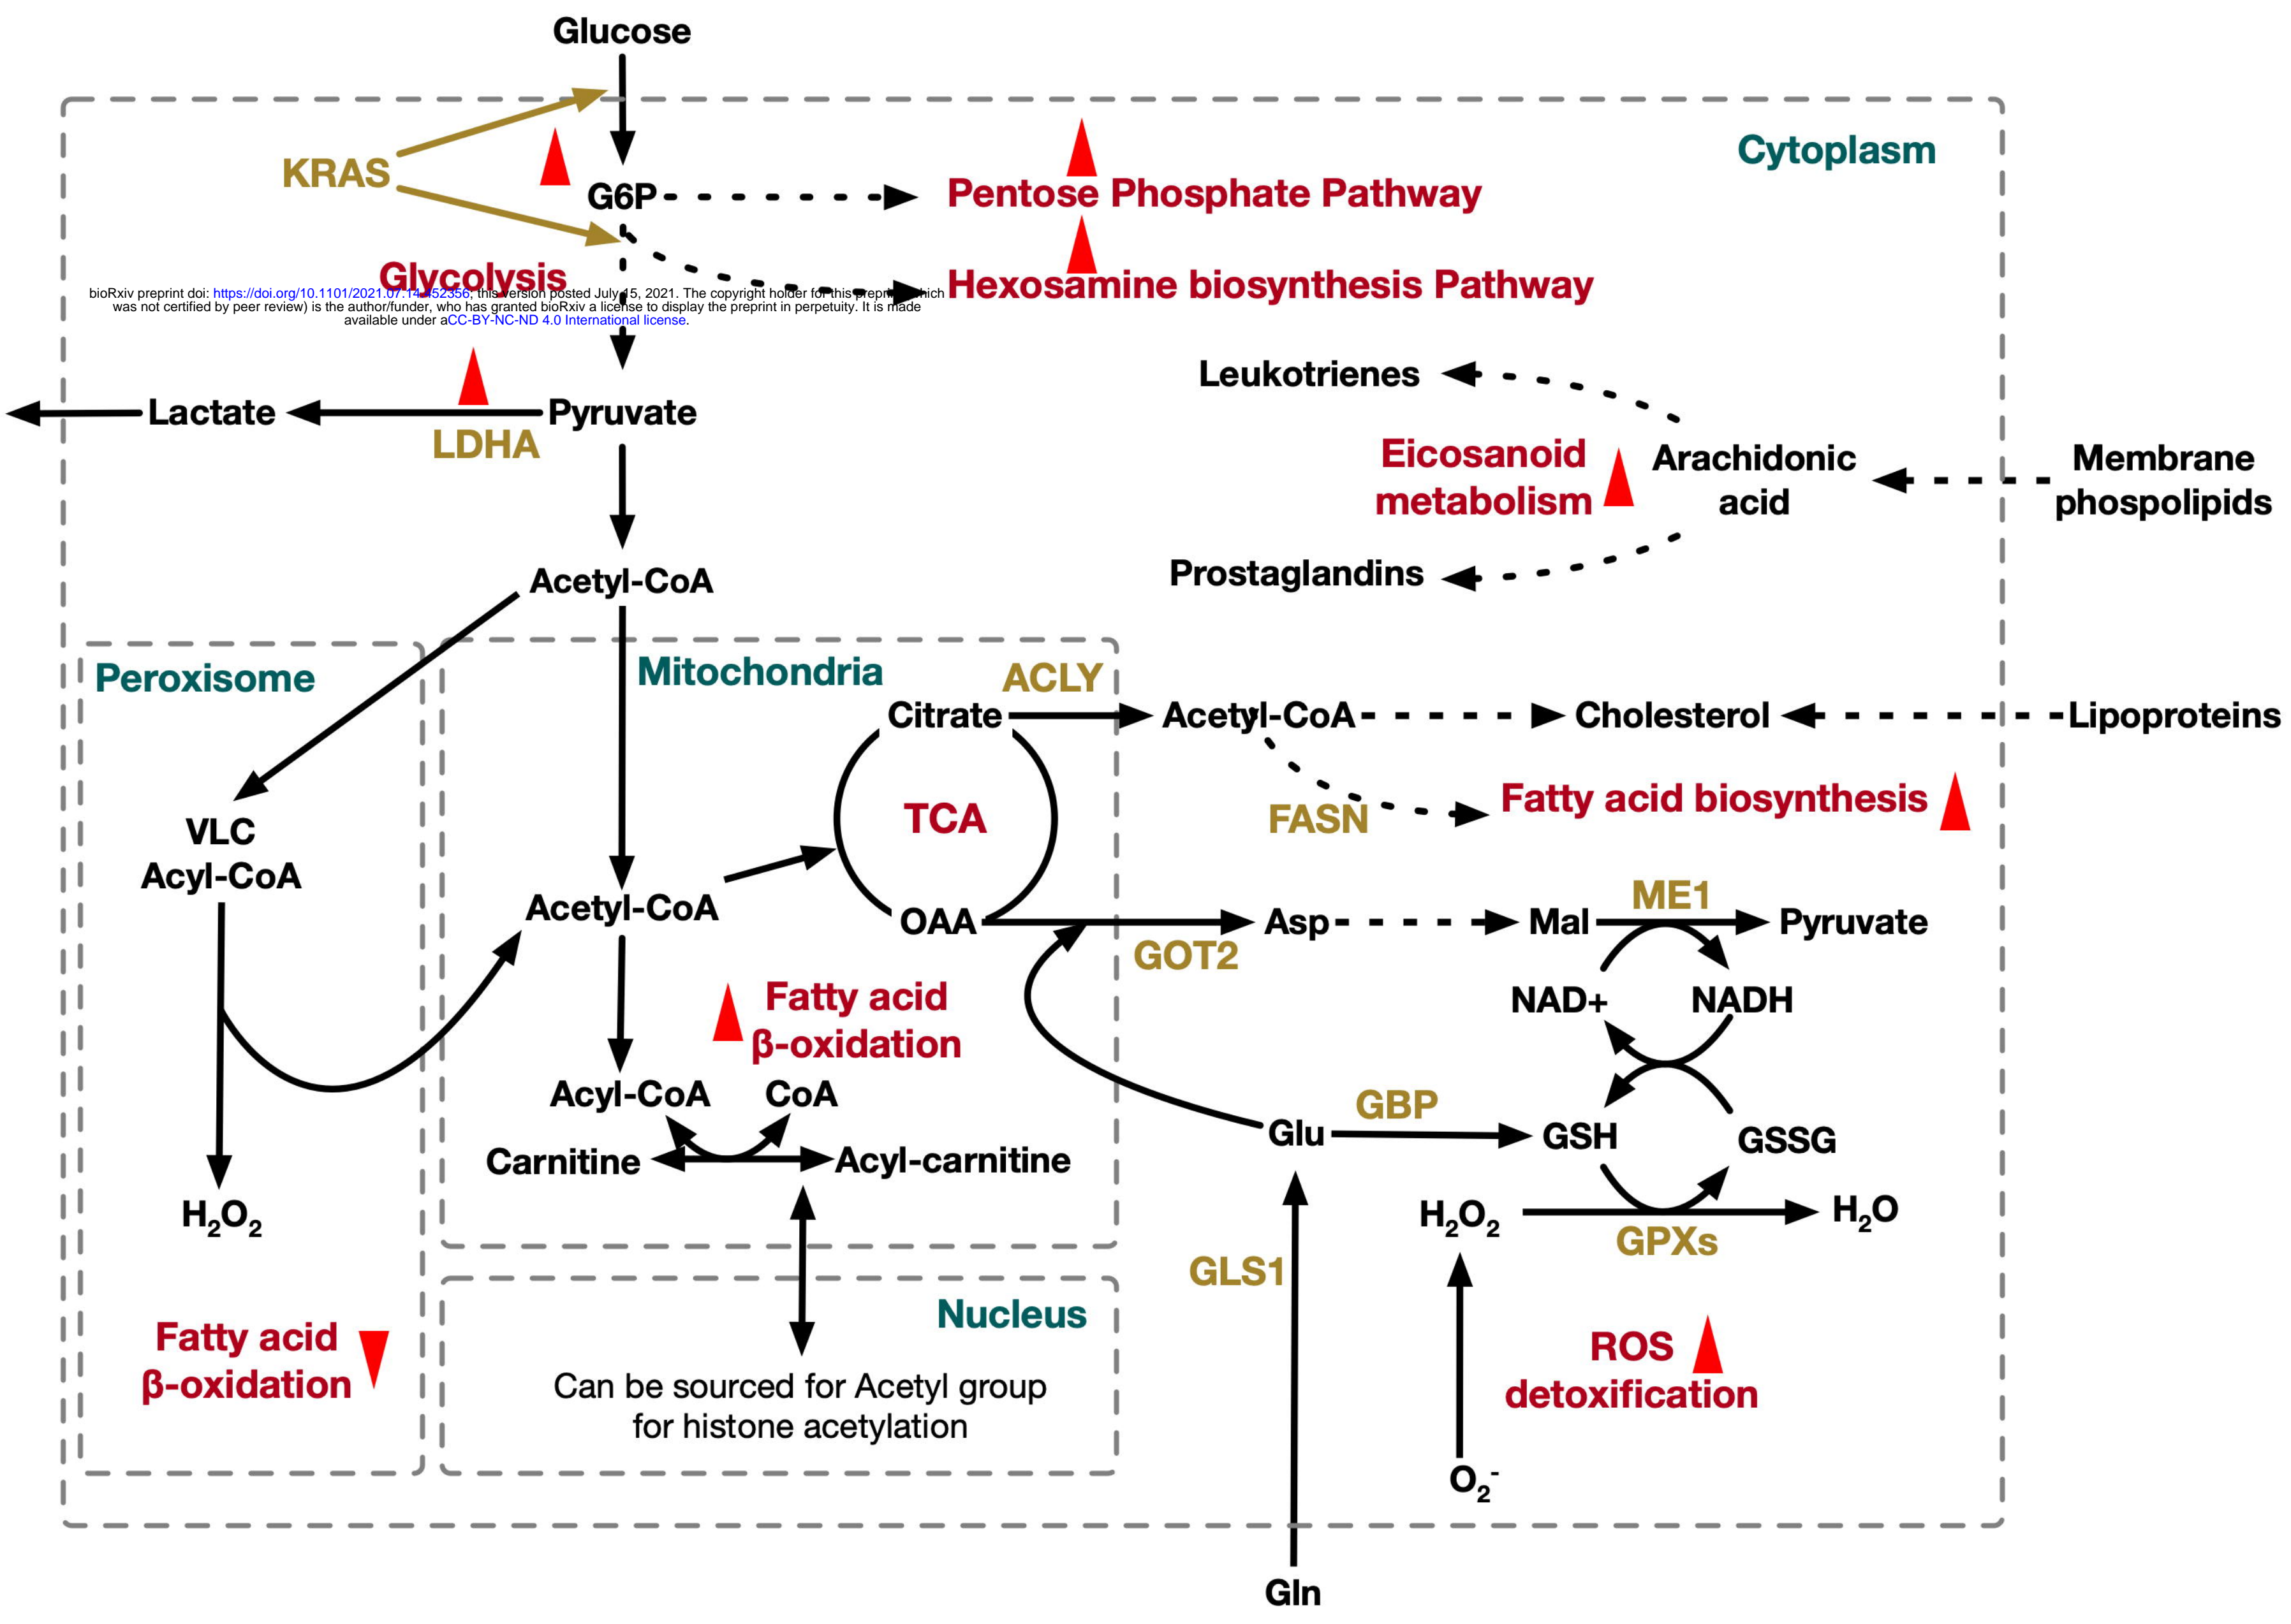



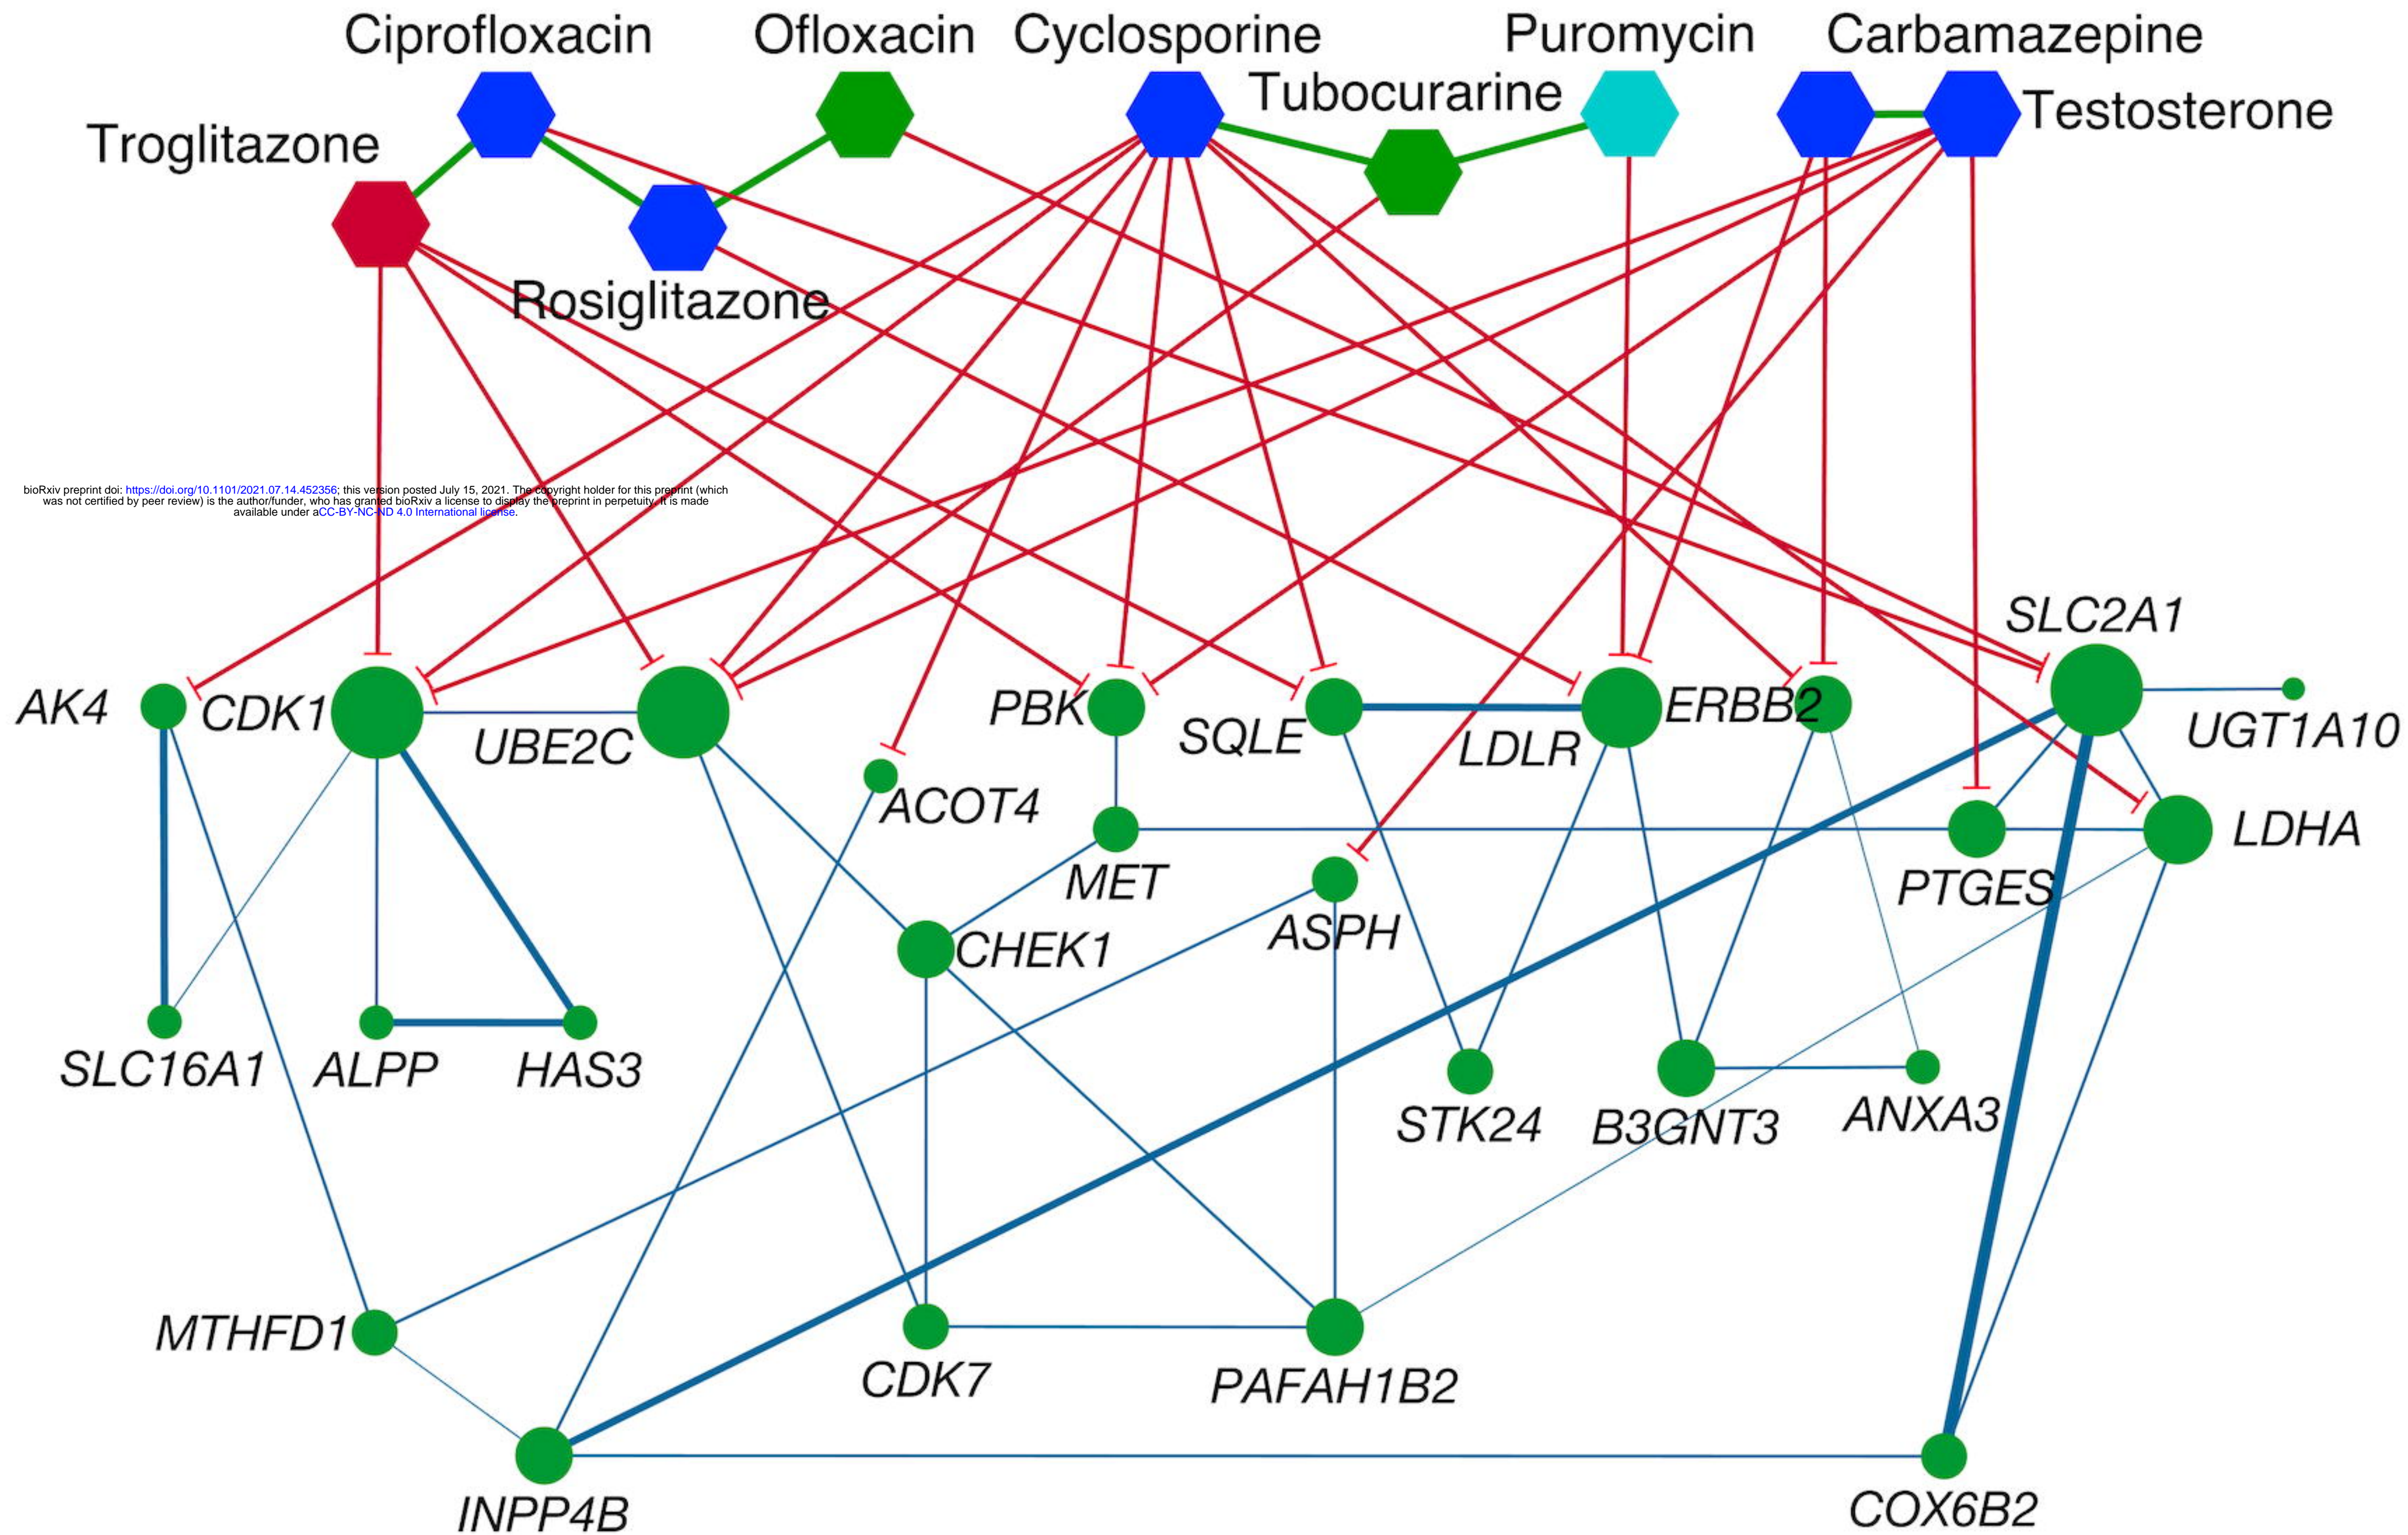

bioRxiv preprint doi: <https://doi.org/10.1101/2021.07.14.452356>; this version posted July 15, 2021. The copyright holder for this preprint (which was not certified by peer review) is the author/funder, who has granted bioRxiv a license to display the preprint in perpetuity. It is made available under aCC-BY-NC-ND 4.0 International license.
